# Supplementary material
Source: PubMed Central journal article supplement (PMC8111561)
Supplement: jamapediatr-e210678-s001.pdf [file jamapediatr-e210678-s001.pdf]

1 **Fortification of Expressed Breast Milk With Preterm**  
2 **Formula Powder vs. Human Milk Fortifier in Preterm (28-**  
3 **34 weeks' Gestation) Very Low Birth Weight Neonates: a**  
4 **Randomized non inferiority trial**

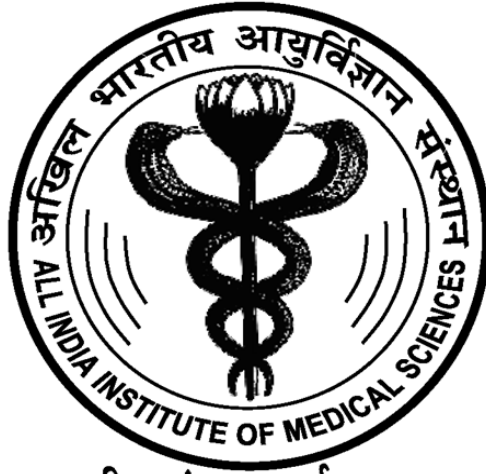

6 शरीरमाद्यं खलु धर्मसाधनम्

7  
8 **STUDY PROTOCOL**

9 Dr. C ARUNAMBIKA

10 Junior Resident

11 Department of Pediatrics

12 All India Institute of Medical Sciences

13 New Delhi, India

14  
15 October 10, 2017

16 AIIMS, New Delhi

17  
18  
19  
20

21

22

23 **Protocol summary in Institute format**

|                                                                                                                                                                                                                              |                                                                                                                                                                                                                                                                                                                                                                                                                                                                                                                                                                                                                                                                                                                                                                                                                                                                                                                                                                                                                                |
|------------------------------------------------------------------------------------------------------------------------------------------------------------------------------------------------------------------------------|--------------------------------------------------------------------------------------------------------------------------------------------------------------------------------------------------------------------------------------------------------------------------------------------------------------------------------------------------------------------------------------------------------------------------------------------------------------------------------------------------------------------------------------------------------------------------------------------------------------------------------------------------------------------------------------------------------------------------------------------------------------------------------------------------------------------------------------------------------------------------------------------------------------------------------------------------------------------------------------------------------------------------------|
| <b>1. Full title of study:</b>                                                                                                                                                                                               | <b>Fortification of Expressed Breast Milk with Preterm Formula Powder vs. Human Milk Fortifier in Preterm (28-34 weeks' Gestation) Very Low Birth Weight Neonates: a Randomized non inferiority trial</b>                                                                                                                                                                                                                                                                                                                                                                                                                                                                                                                                                                                                                                                                                                                                                                                                                      |
| 1a. AIIMS Temporary Research Section Number for all Clinical Trials which are privately funded                                                                                                                               | Not applicable                                                                                                                                                                                                                                                                                                                                                                                                                                                                                                                                                                                                                                                                                                                                                                                                                                                                                                                                                                                                                 |
| <b>2.1 Name &amp; signature of the candidate</b><br><br>2.2 Department<br>2.3 Degree/course<br>2.4 Batch of admission to course<br>2.5 Month & year of submission of thesis<br>2.6 Email ID of the Candidate and Chief Guide | 2.1 Dr. C Arunambika<br>Signature _____<br><br>Department of Pediatrics<br>MD<br>January 2017<br>July 2019<br><a href="mailto:arunambika.chinnappan@gmail.com">arunambika.chinnappan@gmail.com</a><br><a href="mailto:jeevasankar@gmail.com">jeevasankar@gmail.com</a>                                                                                                                                                                                                                                                                                                                                                                                                                                                                                                                                                                                                                                                                                                                                                         |
| <b>3. Objectives of the study</b>                                                                                                                                                                                            | <b>Primary:</b><br>To compare the rate of weight gain from the time of enrolment until discharge from the hospital or 40 weeks' PMA, whichever was earlier, in preterm (28-34 weeks' gestation) VLBW neonates receiving expressed breast milk (EBM) fortified with preterm formula powder with those receiving EBM fortified with commercially available human milk fortifier (HMF).<br><br><b>Secondary:</b><br>Among preterm VLBW neonates receiving EBM fortified with preterm formula powder or HMF, to compare the<br><ol style="list-style-type: none"> <li>1. Proportion of babies growth restricted at term gestation (40 weeks PMA)</li> <li>2. Rates of gain in length and head circumference from the time of enrolment until discharge from hospital and at 40 weeks PMA</li> <li>3. Incidence of feed intolerance and other morbidities including late metabolic acidosis (LMA), necrotizing enterocolitis (NEC) stage 2 or more, anemia requiring blood transfusion(s), and osteopenia of prematurity</li> </ol> |

|                                                                                         |                                                                                                                                                                                                                                                                                                                                                                                                                                                                                                                                                                                                                                                                                                                                                                                                                                                                                                                                                                                                                                                                                                                                                               |
|-----------------------------------------------------------------------------------------|---------------------------------------------------------------------------------------------------------------------------------------------------------------------------------------------------------------------------------------------------------------------------------------------------------------------------------------------------------------------------------------------------------------------------------------------------------------------------------------------------------------------------------------------------------------------------------------------------------------------------------------------------------------------------------------------------------------------------------------------------------------------------------------------------------------------------------------------------------------------------------------------------------------------------------------------------------------------------------------------------------------------------------------------------------------------------------------------------------------------------------------------------------------|
|                                                                                         |                                                                                                                                                                                                                                                                                                                                                                                                                                                                                                                                                                                                                                                                                                                                                                                                                                                                                                                                                                                                                                                                                                                                                               |
| <p><b>4. Why this study is required?</b></p> <p>Please provide brief justification.</p> | <ol style="list-style-type: none"> <li>1. Preterm VLBW neonates require higher energy, protein and mineral requirements, which are not met by unfortified breast milk alone.</li> <li>2. Many newborn care units therefore fortify EBM with commercially available human milk fortifier (HMF).</li> <li>3. But fortification with HMF is expensive and is also associated with high risk of complications like feed intolerance and late metabolic acidosis, which often warrant temporary or permanent withholding of fortification.</li> <li>4. A simpler and more economical option is to use commercially available preterm formula powder, in place of HMF, to fortify EBM. An earlier study from our unit at AIIMS demonstrated no significant difference in the osmolality of milk fortified with HMF and preterm formula powder.</li> <li>5. Fortification with preterm formula powder might be associated with lower risk of feed intolerance and similar (not lower) weight gain in preterm neonates.</li> <li>6. No studies have, however, examined the rates of weight gain following fortification of EB with preterm formula powder.</li> </ol> |
| <p><b>6. Methodology</b></p>                                                            | <ol style="list-style-type: none"> <li>6.1. Number of patients: 124</li> <li>6.2. Inclusion criteria <ol style="list-style-type: none"> <li>1. Preterm neonates born between 28 and 34 weeks of gestation</li> <li>2. Birth weight less than 1500 g</li> <li>3. Accepting oral feeds of at least 100ml/kg/day</li> <li>4. Amount of EBM, as a proportion of total daily milk intake, 75% or greater at enrolment</li> </ol> </li> <li>6.3. Exclusion criteria <ol style="list-style-type: none"> <li>1. Major congenital anomalies</li> </ol> </li> <li>6.4. Study design: Randomized non inferiority trial</li> <li>6.5. Dosages of drug: No drug is being used</li> <li>6.6. Duration of treatment: Till the neonate reaches 40 weeks or 2 kg, whichever is later, provided the neonate is receiving EBM</li> <li>6.7. Investigation specifically related to project: None; work-up including hematocrit, blood gas will be done in case of inadequate weight gain and serum calcium,</li> </ol>                                                                                                                                                            |

|                                                                                                     |                                                                                                                                                                                                                                                                                                                                                                                                                                                                                                                                                                                                                                                                                                                                                                                                                                                                                                                                                                                                                                                                                                                                                                                                                                                                                                                                                                                                                                                                                                                                                                                                                                                                                                                                                                                                                                                                                                   |
|-----------------------------------------------------------------------------------------------------|---------------------------------------------------------------------------------------------------------------------------------------------------------------------------------------------------------------------------------------------------------------------------------------------------------------------------------------------------------------------------------------------------------------------------------------------------------------------------------------------------------------------------------------------------------------------------------------------------------------------------------------------------------------------------------------------------------------------------------------------------------------------------------------------------------------------------------------------------------------------------------------------------------------------------------------------------------------------------------------------------------------------------------------------------------------------------------------------------------------------------------------------------------------------------------------------------------------------------------------------------------------------------------------------------------------------------------------------------------------------------------------------------------------------------------------------------------------------------------------------------------------------------------------------------------------------------------------------------------------------------------------------------------------------------------------------------------------------------------------------------------------------------------------------------------------------------------------------------------------------------------------------------|
|                                                                                                     | <p>phosphate, alkaline phosphatase (ALP) done if Osteopenia of Prematurity is suspected, as decided by the clinical team.</p> <p>6.9 Permission to use copyrighted Questionnaire/ proforma:<br/>Not applicable</p> <p>6.10 Brief methodology:</p> <p>Neonates born between 28 and 34 weeks of gestation, meeting the inclusion criteria will be approached for parental consent. After obtaining consent, the neonate will be enrolled and randomized to receive fortification of his/her mother's expressed breast milk (EBM) with preterm formula powder or human milk fortifier (HMF). Baseline information and anthropometric measurements will be recorded at enrolment. Enrolled neonates will be followed-up with weekly anthropometric measures. In case of inadequate weight gain, laboratory work-up including hematocrit, blood gas will be done and serum calcium, phosphorous, ALP will be done if OOP is suspected till the time of hospital stay. The incidence of various morbidities including feed intolerance and necrotizing enterocolitis (NEC) will be recorded prospectively until discharge from the hospital.</p> <p>Fortification will be continued till the neonate reaches 2 kg or reaches 40 weeks' post menstrual age (PMA), whichever is later (provided he/she is on EBM till that period). Fortification of milk will be done by the concerned staff nurse in the first few days after enrolment, following which the mothers will be trained to fortify EBM. At the time of discharge, mothers will be provided with supply of fortifiers for next two weeks. The supply will be replenished when the neonate turns up every 2 weeks for routine follow-up visits at high-risk clinic or for retinopathy of prematurity (ROP) screening. At 40 weeks, the final information regarding the preterm morbidities and anthropometric measures will be recorded.</p> |
| <p>7. Permission from Drug Controller General of India (DCGI)</p>                                   | <p>1. Required <input type="checkbox"/> 2. <b>Not required</b> <input checked="" type="checkbox"/></p> <p>3. Received <input type="checkbox"/> 4. Applied when <input type="checkbox"/></p>                                                                                                                                                                                                                                                                                                                                                                                                                                                                                                                                                                                                                                                                                                                                                                                                                                                                                                                                                                                                                                                                                                                                                                                                                                                                                                                                                                                                                                                                                                                                                                                                                                                                                                       |
| <p>8. Permission from DGFT, if required</p>                                                         | <p>1. Required <input type="checkbox"/> 2. <b>Not required</b> <input checked="" type="checkbox"/></p> <p>3. Received <input type="checkbox"/> 4. Applied when <input type="checkbox"/></p>                                                                                                                                                                                                                                                                                                                                                                                                                                                                                                                                                                                                                                                                                                                                                                                                                                                                                                                                                                                                                                                                                                                                                                                                                                                                                                                                                                                                                                                                                                                                                                                                                                                                                                       |
| <p>9. a) Safety measures for proposed interventions<br/>b) Results of relevant laboratory tests</p> | <p>a) Safety measures are not required in both groups.</p> <p>b) Will be considered and treated as per standard when abnormal</p>                                                                                                                                                                                                                                                                                                                                                                                                                                                                                                                                                                                                                                                                                                                                                                                                                                                                                                                                                                                                                                                                                                                                                                                                                                                                                                                                                                                                                                                                                                                                                                                                                                                                                                                                                                 |

|                                                                                                                                                                                                       |                                                                                                                                                                                                                                                                                                                       |
|-------------------------------------------------------------------------------------------------------------------------------------------------------------------------------------------------------|-----------------------------------------------------------------------------------------------------------------------------------------------------------------------------------------------------------------------------------------------------------------------------------------------------------------------|
| c) Result of studies in human                                                                                                                                                                         | c) Not applicable.                                                                                                                                                                                                                                                                                                    |
| 10. Plans to withdraw standard therapy in research                                                                                                                                                    | Yes <input type="checkbox"/> No <input checked="" type="checkbox"/>                                                                                                                                                                                                                                                   |
| 11. Plan for provision of coverage for medical risk                                                                                                                                                   | Not applicable.                                                                                                                                                                                                                                                                                                       |
| 12. How you will maintain Confidentiality of subject?                                                                                                                                                 | Information obtained by the study will not be disclosed to any unauthorized person                                                                                                                                                                                                                                    |
| 13. <b>Costs Involved (App. in Rs.)</b><br>13.1 Investigations<br>13.2 Disposables<br>13.3 Implants<br>13.4 Drug / Contrast Media<br><br><b>Who will bear the costs of the requirements? (mark √)</b> | 13.1. No investigations are done for the sole purpose of the study<br>13.2. Free; both HMF and preterm formula powder are available from the hospital supply.<br>13.3. Not required<br>13.4 Free<br><br>1. Patient 2. Project 3. <b>√Exempted</b><br>4. Other Agencies (Name)_____                                    |
| 14. Participant Information Sheet<br>(mark √ if yes)                                                                                                                                                  | √ Attached English version<br>√ Attached Hindi version<br><b>√ Certified that Hindi version is a true translation of English version</b>                                                                                                                                                                              |
| 15. Participant Informed Consent Form<br>(mark √ if yes)                                                                                                                                              | √ Attached English version<br>√ Attached Hindi version<br>√ Certified that Hindi version is a true translation of English version                                                                                                                                                                                     |
| 16. Whether any work on this project Has started or not?                                                                                                                                              | X (mark √ if yes, X if no)<br><i>(Please enclose a separate certificate to this effect).</i>                                                                                                                                                                                                                          |
| 17. Attached documents<br>(If any)                                                                                                                                                                    | 17.1 Covering letter, through proper channel - Yes<br>17.2 Copy of the detailed protocol is mandatory - Yes<br>17.3 Undertaking that the study shall be done in accordance with ICMR and GCP guidelines - Yes<br>17.4 In case of multicentric study, IEC clearance of other centers must be provided – Not applicable |

|  |                                                                                                                                                                                                                                                                                                                                                                                                                                                                                                                                                                                                                                                                                                                                                                                                                                                                                                                      |
|--|----------------------------------------------------------------------------------------------------------------------------------------------------------------------------------------------------------------------------------------------------------------------------------------------------------------------------------------------------------------------------------------------------------------------------------------------------------------------------------------------------------------------------------------------------------------------------------------------------------------------------------------------------------------------------------------------------------------------------------------------------------------------------------------------------------------------------------------------------------------------------------------------------------------------|
|  | <p>17.5 Definite undertaking as to who will bear the expenditure of injury related to the project – Not a drug trial and no trial-related injury is expected</p> <p>17.6 In case an insurance cover is intended, Insurance certificate must be provided (as per ICMR guidelines) - Not applicable</p> <p>17.7: Permission as mentioned in 6.9 - Not applicable</p> <p>17.8: Certificate/undertaking as mentioned in 16 - Yes</p> <p>17.9: In case of Clinical trials, proof of registration of Clinical trial with ICMR needs to be submitted - Yes</p> <p>17.10: Investigator should provide undertaking what they will do with the leftover sample tissue – No samples will be stored; only routine blood tests – as part of the clinical care – would be done.</p> <p>17.11 Soft copy of all the documents in PDF in a two separate files (signed and unsigned) on a single CD - Yes</p> <p>17.12 Others: Nil</p> |
|--|----------------------------------------------------------------------------------------------------------------------------------------------------------------------------------------------------------------------------------------------------------------------------------------------------------------------------------------------------------------------------------------------------------------------------------------------------------------------------------------------------------------------------------------------------------------------------------------------------------------------------------------------------------------------------------------------------------------------------------------------------------------------------------------------------------------------------------------------------------------------------------------------------------------------|

24

25

## 26 INTRODUCTION

27 Preterm birth is a significant public health problem because of associated neonatal mortality,  
28 short and long term morbidities, and disability in later life. Prematurity is the leading cause of  
29 neonatal deaths and the second leading cause of all under-5 deaths.(1) With improvements in  
30 supportive care of preterm neonates and use of surfactant and antenatal steroids to women at risk  
31 of preterm labor, there is a substantial improvement of survival of preterm neonates in recent  
32 years.

33 With increased survival of preterm neonates, extra uterine growth restriction has become an  
34 important issue. The target for growth in these neonates will be to match intrauterine growth  
35 rates as close as possible(2). But it is almost impossible to achieve the intrauterine growth rates  
36 in most preterm neonates. The reasons are manifold: sickness level of preterm neonates in the  
37 first few weeks of life, inability to start enteral feeds, high energy requirements, and the inability  
38 to meet these requirements with breast milk alone.

39 Human milk is a key component of any strategy for enteral feeding in preterm neonates with  
40 beneficial effects in digestion and absorption of nutrients, neurodevelopmental effects, and  
41 decrease in incidence of complications like sepsis and NEC.(3,4) However, breast milk alone is  
42 not enough to meet the high energy, protein, minerals/vitamin requirements of preterm neonates.  
43 A simple comparison of the nutrient content of preterm milk and recommended dietary  
44 allowances (RDA) of preterm neonates – according to ESPGHAN 2010 – clearly shows that the  
45 nutrient needs of these neonates cannot be met even with full enteral feeding of breast milk. To  
46 circumvent this pertinent issue, most neonatal units fortify expressed breast milk (EBM) of  
47 preterm neonates with commercially available human milk fortifiers (HMF).(5)

48 According to a Cochrane meta-analysis of 14 trials , multi-nutrient fortification of breast milk  
49 increased growth rate – weight (mean difference [MD] 1.81 g/kg/day; 95% CI 1.23 to 2.40),  
50 length (MD 0.12 cm/wk; 95 CI 0.07 to 0.17), head circumference (MD 0.08cm/wk; 95% CI 0.04  
51 to 0.12) with no effect on development and NEC (RR 1.57; 95% CI 0.76 to 3.23).(6)

52 The method of fortification of EBM in India is by using powdered HMF. The fortifiers used  
53 commonly in India are Lactodex (Raptakos Brett & Co., India), HIJAM (Endocura Pharma Ltd,  
54 India) and PreNAN (Nestle India Ltd).(7) On fortification with Lactodex HMF, assuming feed  
55 intake of 180 ml/kg/day, RDA of protein, vitamin A, vitamin D and iron are not met. In contrast,

56 with HIJAM, RDA of preterm neonates is met and no further supplements are needed. However,  
57 there is a paucity of data on safety with HIJAM.

58 At our NICU, over a 6-month period of observation from July to December 2016, the proportion  
59 of neonates developing feed intolerance following fortification with HIJAM was found to be  
60 39.2% (29/74). Moreover, we also observed an unusually high incidence of late metabolic  
61 acidosis – about 10.8% – following fortification with HIJAM. Both these complications warrant  
62 withholding of fortification – temporarily or permanently – in these neonates thereby  
63 compromising their optimal growth and nutrition. The prevalence of feed intolerance in neonates  
64 receiving fortification with the other fortifier – Lactodex-HMF – was 26.7% (4/15). Though  
65 there are consensus that both feed intolerance and LMA is considerably less with the use of  
66 PreNAN, studies in this area are considerably limited.

67 The cost of fortification was also high, which for a 1 kg neonate will be around – INR 140-  
68 160/day with HIJAM (INR 20/sachet- 1g) , INR 35-46/day with Lactodex(INR 11.50/ sachet-  
69 2g), INR 198 – 200/day (INR 22/sachet – 1g) with PreNAN which would be a high burden for a  
70 low income family.

71 A simpler, more economical, and possibly more safe option to fortify EBM is to fortify it with  
72 preterm formula powder. Though preterm formula for fortification is routinely done in some  
73 low-income countries, research and literature in this area is still limited to recommend its  
74 use.(8,9)

75 We therefore plan to conduct a randomized trial to compare the efficacy and safety of  
76 fortification of EBM using preterm formula powder (Dexolac SPECIAL- DANONE, India) with  
77 fortification using HMF ( PreNAN ) in terms of short-term weight gain and incidence of feed  
78 intolerance and other morbidities like necrotizing enterocolitis (NEC), LMA, osteopenia of  
79 prematurity, etc.

80



81 **REVIEW OF LITERATURE**

82 Human milk, with its unique compositions, will be the ideal feed for term infants. Preterm  
83 infants, with less mature sucking reflex are usually given expressed breast milk. Breast milk is  
84 easily digested and absorbed. It promotes stool softness and helps in mineral absorption. Breast  
85 milk also has a major role in gut flora development. Available evidence suggests a reduction in  
86 incidence of necrotizing enterocolitis, late onset sepsis, retinopathy of prematurity with reduction  
87 in development of predictive factors of metabolic syndrome( According to a study of Bauer et al  
88 in 2011(10), the breast milk composition at various gestational ages are shown in Table 1. The  
89 average protein content is highest in extremely preterm human milk. The protein content tends to  
90 decrease across higher gestational age groups.

91 **Table 1. Composition of human milk at different gestational ages.(10)**

| <b>Composition</b>   | <b>Extremely<br/>Preterm<br/>(&lt;28 weeks)</b> | <b>Very Preterm<br/>(28-31 weeks)</b> | <b>Moderately<br/>Preterm<br/>(32-33weeks)</b> | <b>Term</b> |
|----------------------|-------------------------------------------------|---------------------------------------|------------------------------------------------|-------------|
| Protein (g/dl)       | 2.3                                             | 2.1                                   | 1.9                                            | 1.6         |
| Carbohydrates (g/dl) | 7.6                                             | 7.5                                   | 7.5                                            | 6.2         |
| Fat (g/dl)           | 4.4                                             | 4.4                                   | 4.8                                            | 4.1         |
| Energy (kcal/dl)     | 77.8                                            | 77.6                                  | 76.7                                           | 67.7        |
| Sodium (mmol/l)      | 10.6                                            | 10.6                                  | 10.4                                           | 11.2        |
| Potassium (mmol/l)   | 14.0                                            | 13.1                                  | 12.1                                           | 11.5        |
| Calcium (mmol/l)     | 6.2                                             | 6.5                                   | 7.4                                            | 5.4         |
| Phosphate (mmol/l)   | 2.2                                             | 2.1                                   | 2.0                                            | 1.9         |

92

93 Preterm milk although has higher energy, protein, fat and minerals, as compared to term milk is  
94 still insufficient to meet the high requirements of growing preterm infants, when compared with  
95 the ESPGHAN recommendations of recommended dietary allowences, as can be seen in Table 2.

96

97

98



100 **Table 2: Nutrient composition of unfortified breast milk, on fortification with Lactodex**  
 101 **and HIJAM, and the RDA as per ESPGHAN 2010(5).**

| <b>COMPONENTS</b>        | <b>HUMAN MILK<sup>@</sup></b><br><b>(180ML/KG/DAY)</b> | <b>EBM +</b><br><b>LACTODEX<sup>#</sup></b><br><b>(180ml//kg/day)</b> | <b>EBM+ HIJAM<sup>§</sup></b><br><b>180ml/kg/day</b> | <b>ESPGHAN</b><br><b>(kg/day)</b> |
|--------------------------|--------------------------------------------------------|-----------------------------------------------------------------------|------------------------------------------------------|-----------------------------------|
| <b>Energy</b>            | 120.6                                                  | 147.6                                                                 | 145.8                                                | 110-135                           |
| <b>Protein, g</b>        | 1.98                                                   | 2.7                                                                   | 3.78                                                 | 3.5-4.5                           |
| <b>Fat, g</b>            | 6.3                                                    | 6.5                                                                   | 8.1                                                  | 4.8-6.6                           |
| <b>Vitamin A, IU</b>     | 86.4                                                   | 518                                                                   | 1202                                                 | 1320-3300                         |
| <b>Vitamin D, IU/day</b> | 14.4                                                   | 151                                                                   | 734                                                  | 800-1000                          |
| <b>Calcium, mg</b>       | 45.5                                                   | 225                                                                   | 225                                                  | 120-140                           |
| <b>Phosphorous, mg</b>   | 26.1                                                   | 115                                                                   | 116                                                  | 60-90                             |
| <b>Iron, mg</b>          | 0.16                                                   | 0.09                                                                  | 2.7                                                  | 2-3                               |

<sup>@</sup> Human milk – Preterm mature milk. Deficient in calorie, carbohydrates, proteins, Vitamin A,D, Calcium, Phosphorous, Iron  
<sup>#</sup> With Lactodex, Protein, Vitamin A,D, Calcium, Phosphorous, iron are deficient  
<sup>§</sup> HMF – Meets RDA closely in all aspects

102  
 103 Target of growth in preterm infants would be to match the intrauterine growth curves as close as  
 104 possible. However these infants are prone to extrauterine growth restriction, due to numerous  
 105 factors. A study was done by Adriana et al, a retrospective analysis to assess the nutritional  
 106 practices in NICU and their association with growth parameters of preterm infants. They  
 107 included 305 preterm infants, stratified into 500-999gms and 1000-1499gms. According to them,  
 108 insufficient management of parenteral nutrition like delay in starting parenteral nutrition and  
 109 delaying aminoacids and lipids, restricting the maximum supply of nutrition and delay in hiking  
 110 up the nutrients were important during the initial days. With regard to enteral nutrition, delay in  
 111 starting minimal enteral nutrition, delay in hiking up feeds to attain a nutrition of 120kcal/kg/day,  
 112 frequent interruptions in enteral feeding were important factors in growth of preterm neonates.  
 113 The proportion of babies found to be SGA at term gestation was high around 82.5% in 500-999g  
 114 group and 72.7% in 1000-1499g group.

115 According to Corpeleijin W.E. et al, having favourable postnatal growth after a period of growth  
 116 restriction is associated with favourable neurodevelopmental outcome with insulin resistance and  
 117 metabolic syndrome later in life. Also monitoring postnatal growth is complicated with current

118 growth charts reflecting nutritional practices rather than the reflection of preterm infants growth  
 119 potential. Proportion of preterm infants that are severely growth retarded(<3<sup>rd</sup> centile) at  
 120 admission to NICU is 1%, which increases to 55% at the time of discharge.

121 According to Su BH et al, the proportion of growth restriction in very low birth weight infants  
 122 varies between 43% to 97% in various centers. The observed difference could be due to different  
 123 reference growth charts and nonavailability of a standard nutritional strategy.

124 **Table 3: Studies on prevalence of growth restriction and analysis of possible causes.**

| <b>AUTHOR/<br/>YEAR</b>            | <b>STUDY<br/>METHODOLOGY</b>                                                  | <b>OUTCOME<br/>MEASURES</b>                                          | <b>RESULTS</b>                                                                                                                                                                                                                                                                                                                                                                                |
|------------------------------------|-------------------------------------------------------------------------------|----------------------------------------------------------------------|-----------------------------------------------------------------------------------------------------------------------------------------------------------------------------------------------------------------------------------------------------------------------------------------------------------------------------------------------------------------------------------------------|
| DENG Ying et al<br><br>China, 2016 | Observational study<br><br>N= 61<br><br>Time – 12 months                      | 1.Growth parameters(z score)<br><br>2. Developmental parameter(DDST) | 1.Proportion of underweight, growth retardation, emaciation, microcephaly, overweight, obesity were 15%, 16%, 11%, 13%, 20%, 10% respectively<br><br>2. 25% had abnormal developmental quotient.<br><br>3. SGA group had significantly higher incidence of growth retardation and abnormal DQ than AGA group.                                                                                 |
| Adriana et al                      | Observational study<br><br>N=305<br><br>D1 = 500-999gm<br><br>D2 = 1000-1499g | NICU nutritional practices and their influence of neonatal growth    | Factors adversely affecting neonatal growth :<br><br>Parenteral nutrition:<br><br>Delay in starting parenteral nutrition, delay in achieving a calorie intake of 120 kCal/kg/day, delay in introducing aminoacids and lipids, failure to achieve maximum levels.<br><br>Enteral nutrition :<br><br>Delay in introducing MEN, delay in hiking up feeds, delay in achieving full feeds, lack of |

|                        |                                                                                                                                                                                                                                                                                                                                                                                                                                           |  |                                                                                                                                                 |
|------------------------|-------------------------------------------------------------------------------------------------------------------------------------------------------------------------------------------------------------------------------------------------------------------------------------------------------------------------------------------------------------------------------------------------------------------------------------------|--|-------------------------------------------------------------------------------------------------------------------------------------------------|
|                        |                                                                                                                                                                                                                                                                                                                                                                                                                                           |  | <p>fortification, frequent interruptions.</p> <p>Proportion of growth restriction at term gestation : 82.5% in D1 group, 72.7% in D2 group.</p> |
| Corpeleijin W.E. et al | <p>1. Proportion of severe growth restriction (&lt;3<sup>rd</sup> centile) at admission to NICU is 1%, while at discharge it is 55%</p> <p>2. Monitoring growth in these babies is difficult due to lack of standard growth curves.</p> <p>3. Favourable growth after a period of growth restriction is associated with favourable neurodevelopment although associated with insulin resistance and metabolic syndrome later in life.</p> |  |                                                                                                                                                 |
| Su BH et al            | <p>1. Proportion of growth retardation in preterm infants at term gestation varies from 43 – 97% in various centers.</p> <p>2. Observed difference in different centers can due to different growth curves used and the non availability of standard feeding techniques.</p>                                                                                                                                                              |  |                                                                                                                                                 |

125

126 A meta-analysis was done by Brown et al in 2016, to determine whether multinutrient fortified  
 127 human breast milk (with human milk fortifiers) improves growth and development of the infant  
 128 without increasing the adverse effects when compared to unfortified milk.(6) They included 14  
 129 trials in which 1071 infants had participated. The individual studies were small and had weak  
 130 methodology. The analysis showed a low quality evidence that multi-nutrient fortification of  
 131 breast milk increased growth rate – weight (mean difference [MD] 1.81 g/kg/day; 95% CI 1.23  
 132 to 2.40), length (MD 0.12 cm/wk; 95 CI 0.07 to 0.17), head circumference (MD 0.08cm/wk;  
 133 95% CI 0.04 to 0.12) with statistically insignificant effect on development (mental  
 134 developmental index 2.2 more- 3.35 fewer to 7.75 more) and NEC (RR 1.57; 95% CI 0.76 to  
 135 3.23).

136 Kanya Mukhopadhyay et al did a similar RCT in Indian setting, involving 166 babies,  
 137 randomized to receive unfortified breast milk and breast milk fortified with human milk  
 138 fortifiers.(11) The results were analysed separately for SGA and AGA babies. The mean  
 139 difference for weight gain was 3.2 g/kg/day, increase in length 0.18 cm/wk, head circumference  
 140 0.08cm/wk more in the fortified group, which was statistically significant. Serum levels of

141 sodium, calcium, phosphorous and ALP were comparable between the two groups. Similar  
 142 incidence of sepsis, NEC, IVH, PDA was found, however there was a slightly increased in  
 143 incidence of chronic lung disease in the fortified group(p=0.036). On subgroup analysis, the  
 144 fortified SGA group(n=37) had statistically significant difference in gain of weight and increase  
 145 in length as compared to the control group. In AGA group, there was no statistical significance in  
 146 weight gain between the two groups, however the gain in length and head circumference was  
 147 significant.

148 **Table 4: Studies comparing Fortified and Unfortified milk in preterm VLBW babies.**

| <b>AUTHOR/<br/>YEAR</b>                                               | <b>STUDY<br/>METHODOLOGY</b>                                                                                  | <b>OUTCOME<br/>MEASURES</b>                                                                                                                    | <b>RESULTS</b>                                                                                                                                                                                                                                                                                                                                                                   |
|-----------------------------------------------------------------------|---------------------------------------------------------------------------------------------------------------|------------------------------------------------------------------------------------------------------------------------------------------------|----------------------------------------------------------------------------------------------------------------------------------------------------------------------------------------------------------------------------------------------------------------------------------------------------------------------------------------------------------------------------------|
| Brown VE et al<br>Cochrane<br>library<br>2016                         | Systemic review<br>Num of articles: 14<br>RCT<br>Num of Infants:<br>1071                                      | 1. Anthropometric<br>parameters<br>2. Developmental<br>parameters<br>3. Complications                                                          | 1. Fortification increases rate of<br>growth: weight (MD<br>1.81g/kg/d;95% CI 1.23 to<br>2.40), length (MD 0.12cm/wk,<br>95% CI 0.07 to 0.17) and Head<br>circumference (MD 0.08cm/wk,<br>95% CI 0.04-0.12)<br>No difference in growth and<br>developmental parameters<br>beyond infancy.<br>2. Low quality evidence that<br>fortification does not increase<br>the risk of NEC. |
| Kanya<br>Mukhopadhyay<br>et al<br>Indian<br>Pediatrics<br>2007, India | Randomized<br>Controlled trial<br>HMF= 85<br>Unfortified<br>controls= 81<br><br>Stratified for SGA<br>and AGA | 1. Anthropometric<br>measures<br>2. Biochemical<br>parameters<br>3. Length of<br>hospital stay<br>4. Morbidities-<br>PDA, LOS, CLD<br>and IVH. | 1. Fortified group had<br>significantly better weight gain,<br>increase in length and head<br>circumference.<br>2. Sodium, calcium,<br>phosphorous and ALP was<br>comparable in both groups.<br>3. Incidence of LOS, PDA, IVH,<br>and NEC were similar in both<br>groups, but CLD was more in<br>fortifier group.                                                                |

149  
 150 There was a single study studying preterm formula powder as a fortifying option in feeding  
 151 preterm VLBW infants. Probably this could be because majority of studies on fortifying breast  
 152 milk was done on developed countries where human milk fortifiers are easy to obtain. In

153 developing, low income countries, where human milk fortifiers are difficult to obtain(12) in a  
 154 community setting, preterm formula powder in fortifying breast milk is routinely used(6).

155 In this study done in Egypt by El Sakka et al, 50 babies (25 in each group), with <37 weeks  
 156 babies, weighing <1500 gms, there was a statistically significant difference in the rate of weight  
 157 gain – 3.0g/kg/day, length – 0.18cm/wk and head circumference 0.09cm/wk between the two  
 158 groups.(8) Mean hemoglobin was significantly lower in the no fortification group(10.75±1.47 vs  
 159 11.94±2.32), when compared with the fortified group. However, there was statistically  
 160 insignificant increase in feed intolerance (12% Vs 4%) and the duration of hospital stay in the  
 161 fortification group.

162 **Table 5: Study evaluating preterm formula as a fortifying option in preterm VLBW babies.**

| AUTHOR/<br>YEAR                                | STUDY<br>METHODOLOGY                                                                               | OUTCOME<br>MEASURES                                                                                                                 | RESULTS                                                                                                                                                                                                                                                                                                                                                                                                                 |
|------------------------------------------------|----------------------------------------------------------------------------------------------------|-------------------------------------------------------------------------------------------------------------------------------------|-------------------------------------------------------------------------------------------------------------------------------------------------------------------------------------------------------------------------------------------------------------------------------------------------------------------------------------------------------------------------------------------------------------------------|
| El Sakka et al<br>Pediatric Rep<br>2016, Egypt | Prospective Case<br>control study<br>Preterm formula<br>fortification, n=25<br>No fortification=25 | 1. Anthropometric<br>measures<br>2. Biochemical<br>parameters<br>3. Length of<br>hospital stay.<br>4. Incidence of<br>complications | 1. Rate of gain of weight<br>between 2 groups: 16.8 and<br>13.8g/kg/day, Length: 0.76 and<br>0.58 cm/ week, Head<br>circumference 0.59 and 0.5<br>cm/week.<br>2. Hemoglobin was significantly<br>higher in cases.<br>3. Duration of hospital stay was<br>longer in the intervention group.<br>4. Incidence of feed intolerance<br>and sepsis was higher in the<br>fortification group. (statistically<br>insignificant) |

163  
 164 Various studies were done to compare the efficacy and safety of fortifying expressed breast milk  
 165 when compared with using formula feeds in these infants. Wang et al, in 2012, studied 125  
 166 infants and found there was no statistically significant difference in gain of weight, length and  
 167 head circumference. Serum levels of protein nutritional status like BUN, prealbumin and serum  
 168 calcium was lower in the intervention group when phosphorous and ALP was comparable  
 169 between the two groups. However, there was a statistically significant reduction in the incidence  
 170 of sepsis in the fortified EBM group (16.1% Vs 31.7%).

171 A similar study was done by Wu Y et al in a similar setting, which also reinforced the above  
 172 findings. They concluded that, there was no statistically significant difference in the gain of  
 173 weight and head circumference, though there was a difference in the rate of gain of length. There  
 174 was no difference in the incidence of extrauterine growth restriction or the age of rebounding to  
 175 birth weight. They also found a significant reduction of feed intolerance and sepsis in the breast  
 176 milk fed groups.

177 A study with similar objectives was done by Schaller et al with 108 babies and they differed  
 178 from the previous two studies, in their conclusions. They found that the rate of gain of weight,  
 179 length and head circumference in HMF group was slower than the formula fed group, however  
 180 the gain in formula fed group surpassed the normal intrauterine nutrient assimilation rate in these  
 181 infants. Also, the rates of late onset sepsis and necrotizing enterocolitis was higher in the formula  
 182 fed group.

183 **Table 6: Studies comparing benefits of EBM fortification with preterm formula feeding.**

| <b>AUTHOR/<br/>YEAR</b>                                | <b>STUDY<br/>METHODOLOGY</b>                                    | <b>OUTCOME<br/>MEASURES</b>                                                                                                                                  | <b>RESULTS</b>                                                                                                                                                                                                                                           |
|--------------------------------------------------------|-----------------------------------------------------------------|--------------------------------------------------------------------------------------------------------------------------------------------------------------|----------------------------------------------------------------------------------------------------------------------------------------------------------------------------------------------------------------------------------------------------------|
| Wang et al<br>Zhonghua Er Ke<br>Ze Zhi<br>2012, China  | Prospective<br>controlled study<br>HMF= 62<br>Formula feeds= 63 | 1. Velocity of gaining<br>weight, length,<br>head circumference<br>2. Time for regaining<br>birth weight<br>3. Biochemical<br>parameters<br>4. Complications | 1. Length 0.7Vs<br>0.6cm/wk, HC 1.1 Vs 0.9,<br>weight gain was similar in<br>both groups.<br>2. Lower BUN,<br>Prealbumin and calcium in<br>HMF group with no<br>difference in PO4 and<br>ALP.<br>3. Sepsis was lower in<br>HMF group (16.1% Vs<br>31.7%) |
| Wu Y et al<br>Beijing Da Xue<br>Xue Bao<br>2016, China | Randomized<br>controlled study<br>HMF= 62<br>Formula feeds=60   | 1.Velocity of gaining<br>weight, length, head<br>circumference<br>2.Time for regaining<br>birth weight<br>3.Biochemical<br>parameters<br>4. Complications    | 1. Gain of length more in<br>HMF group, other<br>parameters being similar<br>2. Age of rebounding to<br>birth weight was longer in<br>HMF group. No difference<br>in the incidence of EUGR.<br>3. ALP was higher in<br>HMF group.(363.98 Vs<br>299.73)   |



|                                 |                                                                     |                                                |                                                                                                                                                                                                                                |
|---------------------------------|---------------------------------------------------------------------|------------------------------------------------|--------------------------------------------------------------------------------------------------------------------------------------------------------------------------------------------------------------------------------|
|                                 |                                                                     |                                                | 4. Incidence of feed intolerance (6.5% Vs 18.3%) and sepsis (4.8% Vs 16.7%) lower in HMF group.                                                                                                                                |
| Schaller et al Pediatrics 1999, | Prospective controlled trial<br>HMF= 62<br>Preterm formula feeds=46 | 1. Anthropometric measures<br>2. Complications | 1. Rate of increase in weight, length, HC, Increase in skin fold thickness slower in HMF group.<br>2. Incidence of NEC and LOS lesser in HMF group.<br>3. The postnatal growth surpassed IU growth rate in Formula feed group. |

184

185 Even though there is level 1 evidence to recommend enteral feeding with fortified breast milk for  
 186 optimal growth in these infants, there are paucity of studies to recommend the single best  
 187 fortifying option in terms of efficacy, safety and economical aspects. Fortifying with human milk  
 188 fortifiers is found to have increased incidence of feed intolerance, late metabolic acidosis,  
 189 necrotizing enterocolitis in addition to having high cost of fortification. Various studies have  
 190 studied the complications of human milk fortifiers.

191 A retrospective cohort analysis was done by Cibulskis et al after a change of policy to use liquid  
 192 human milk fortifier.(12) They studied 2 cohort using liquid HMF and powdered HMF, with a  
 193 total of 100 neonates and found that incidence of metabolic acidosis was more common in liquid  
 194 HMF than powdered HMF (54% vs 10%), with more discontinuation rates in liquid HMF group  
 195 (62% vs 18%). There was no statistically significant difference in the incidence of feed  
 196 intolerance between the two groups (27% vs 38%).

197 At our NICU, over a 6-month period of observation from July to December 2016, the proportion  
 198 of neonates developing feed intolerance following fortification with HIJAM was found to be  
 199 39.2% (29/74). Moreover, we also observed an unusually high incidence of late metabolic  
 200 acidosis – about 10.8% – following fortification with HIJAM. Both these complications warrant  
 201 withholding of fortification – temporarily or permanently – in these neonates thereby  
 202 compromising their optimal growth and nutrition. The prevalence of feed intolerance in neonates  
 203 receiving fortification with the other fortifier – Lactodex-HMF – was 26.7% (4/15). The cost of

204 fortification was also high, which for a 1 kg neonate will be around – INR 140-160/day with  
205 HIJAM (INR 20/sachet- 1g) and INR 35-46/day with Lactodex(INR 11.50/ sachet- 2g), which  
206 would be a high burden for a low income family.

207 Hence, a consensus was reached in our unit – NICU AIIMS and HIJAM was replaced with  
208 PreNAN which reportedly had less complications.

209 Ganapathy et al studied the incidence of another rare complication – Necrotising enterocolitis  
210 and their economical implication with human milk fortifiers from a previously done RCT by  
211 Sullivan et al. They found the incidence of NEC (medical and surgical) to be 16% and 10% for  
212 Bovine based HMF as compared to 6% and 1% in case human milk based HMF is used.  
213 Additional costs incurred for medical and surgical NEC would be \$74K and \$198K respectively.

214

215 In a study done by R Agarwal et al in AIIMS, New Delhi, they found statistically significant  
216 increase in osmolality of breast milk on adding both human milk fortifier and low birth weight  
217 formula powder.(13) However there was no increase in osmolality on keeping it was six hours,  
218 thereby ruling out bacterial cause for increase in osmolality. The possible explanation could be  
219 that the maltodextrin present in these compounds was broken by amylase present in breast milk,  
220 thereby increasing osmolality. Since osmolality of feed is directly proportional to the incidence  
221 of feed intolerance, addition of these compounds could possibly increase the incidence of feed  
222 intolerance in infants.

223 However, a retrospective cohort study done by Moody GJ et al with 76 babies, they found  
224 although there is increase in the incidence of increased gastric residuals and episodes of vomiting  
225 with addition of human milk fortifiers, there is no difference in the number of feeds withheld or  
226 time to achieve full enteral feeding or the duration of hospital stay. They concluded, the addition  
227 of HMF does not adversely affect the outcome of the preterm neonate.

228

229 **Table 7: Studies studying various complications of HMF.**

| <b>AUTHOR/<br/>YEAR</b>                                          | <b>STUDY<br/>METHODOLOGY</b>                                                                | <b>OUTCOME<br/>MEASURES</b>                                                                                                                                                                                                                                                              | <b>RESULTS</b>                                                                                                                                                                                                                                                                                                                                    |
|------------------------------------------------------------------|---------------------------------------------------------------------------------------------|------------------------------------------------------------------------------------------------------------------------------------------------------------------------------------------------------------------------------------------------------------------------------------------|---------------------------------------------------------------------------------------------------------------------------------------------------------------------------------------------------------------------------------------------------------------------------------------------------------------------------------------------------|
| 1. CC Cibulskis et al<br>J. of Perinatology<br>2015, USA         | Retrospective cohort analysis<br>N= 100<br>Liquid HMF=50<br>Powdered HMF=50                 | 1. Incidence of metabolic acidosis<br>2. Incidence of feed intolerance<br>3. Incidence of NEC, LOS, Length of hospital stay.                                                                                                                                                             | 1. Metabolic acidosis more common with Liquid HMF (54% Vs 10%)<br>2. Discontinuation rates were more common in Liquid HMF (62% Vs 18%)<br>3. No difference in feed intolerance between powdered and liquid HMF                                                                                                                                    |
| 2. Ganapathy et al<br>Breastfeeding medicine<br>2012, California | Cost analysis of a prev RCT(Sullivan et al)<br>n=207<br>Human milk HMF=138<br>Bovine HMF=69 | 1. Incidence of Medical and surgical NEC<br>2. Additional costs involved with surgical and medical NEC                                                                                                                                                                                   | 1. Incidence of NEC(medical and surgical) 16% and 10% for Bovine based HMF and 6%, 1% for human milk HMF<br>2. Additional costs incurred for medical and surgical NEC- \$74K and \$198K resp                                                                                                                                                      |
| 3. Moody GJ et al<br>J Pediatric GE Nutr<br>2000                 | Retrospective Cohort study<br>N=76                                                          | 1. Milk intake, episodes of Abdominal distention, Gastric residual volume > 2ml/kg or >50% of prefeed, Bile stained/ blood stained GRV, emesis, regurgitation.<br>2. Number of episodes of Apnea and bradycardia; changes in abdominal examination<br>3. Number of hours feeds withheld. | 1. Significant increase in number of episodes of GRV >2ml/kg and emesis after adding HMF.<br>2. No difference in number of feeds withheld or other clinical findings.<br>3. No delay in the time to achieve full feeds, complete oral feeds or hospital discharge.<br>Thus, addition of HMF does not adversely affect outcome of preterm neonate. |
| 4. R Agarwal et al<br>Indian Pediatrics<br>Jan 2004              | Prospective Blinded study<br>N= 48                                                          | 1. Osmolality of breast milk with and without fortification.<br>2. Change in osmolality on storing for 20 min.                                                                                                                                                                           | 1. Fortifying with HMF and LBW formula resulted in significant rise in osmolality<br>2. No further rise was observed on storage upto 6 hours.                                                                                                                                                                                                     |

230  
 231 Keeping in view with the above high complication rate and high cost incurred with human milk  
 232 fortifier, a simple, economical and more plausible option is to fortify breast milk with preterm  
 233 formula powder as done in certain centers. However with preterm formula fortification, there is  
 234 lack of adequate studies to recommend its use in a community setting. A single study was done

235 previously in Thailand by Khorana et al comparing the two – Human milk fortifier and preterm  
 236 formula fortification.

237 According to the study by Khorana et al, which was a randomized controlled trial with a small  
 238 sample size, n=33, they concluded there is no statistical difference in the growth parameters  
 239 between the two groups.(9) The two groups had similar biochemical parameters and the  
 240 incidence of complications were also similar in both the groups. However the cost incurred was  
 241 20 times higher in the human milk fortifier group. Thus their recommendation was to use  
 242 preterm formula powder as a fortifying option in case human milk fortifiers are not available.

243 **Table 8: Study comparing HMF and preterm formula powder as a fortifying option.**

| AUTHOR/<br>YEAR                                       | STUDY<br>METHODOLOGY                                                                     | OUTCOME<br>MEASURES                                                               | RESULTS                                                                                                                                                                                             |
|-------------------------------------------------------|------------------------------------------------------------------------------------------|-----------------------------------------------------------------------------------|-----------------------------------------------------------------------------------------------------------------------------------------------------------------------------------------------------|
| Khorana et al<br>J Med Asso<br>Thai<br>2014, Thailand | Randomized<br>controlled trial<br>N=33<br>HMF=18, Preterm<br>formula<br>fortification=15 | 1. Anthropometric<br>measures<br>2. Biochemical<br>parameters<br>3. Complications | 1. No difference in growth<br>parameters.<br>2. No difference in biochemical<br>parameters in both groups.<br>3. No difference in the<br>incidence of complications<br>4. Cost was 20 times higher. |

244

245 Comparing the RDA of preterm infants and nutritional information of breast milk on adding  
 246 human milk fortifier, in particular HIJAM, with that of preterm formula powder, DEXOLAC –  
 247 SPECIAL, it can be seen that preterm formula fortification will be deficient in calcium,  
 248 phosphorous, Iron, vitamin A, D. Thus, preterm formula fortification will additionally require  
 249 supplementing deficient nutrients.

250

251 **Table 9: Data comparing HIJAM fortification and fortification with preterm formula  
 252 powder.**

|               | RDA       | HMF- HIJAM | Preterm formula |
|---------------|-----------|------------|-----------------|
| Energy(Kcal)  | 110-135   | 145.8      | 153             |
| Protein       | 3.5-4.0   | 3.78       | 3.5             |
| Fats          | 4.8-6.6   | 8.1        | 8.6             |
| Carbohydrates | 11.6-13.2 | 16.8       | 15.4            |
| Calcium       | 120-140   | 225        | 104             |
| Phosphate     | 0-90      | 116        | 56              |
| Vit A         | 1330-3330 | 1202       | 788             |

|       |          |      |     |
|-------|----------|------|-----|
| Iron  | 2-3      | 2.7  | 0.9 |
| Zinc  | 1.1-2.0  | 0.88 | 0.9 |
| Vit D | 800-1000 | 734  | 36  |

253 **What is already known?**

- 254 1. Preterm VLBW neonates require higher energy, protein and mineral requirements, which  
255 are not met by unfortified breast milk alone.
- 256 2. There is level I evidence to suggest the use of fortified EBM in preterm infants<sup>(5)</sup>
- 257 3. Traditionally HMF is used. Fortifiers used in INDIA – According to a 6 month  
258 observation in NICU, AIIMS during July – Dec, 2016
- 259 a. Lactodex: Need of additional supplements. Protein requirement will not be met.  
260 Incidence of feed intolerance of 26.7%.
- 261 b. HIJAM: High incidence of feed intolerance of 39.2% and late metabolic acidosis  
262 of 10.8%. High cost involved – INR 20/ sachet – 1 g.
- 263 c. PreNAN : Needs additional Vit D supplementation. Reportedly has less  
264 complications, though limited studies. High cost involved – INR 22/ sachet – 1 g.
- 265 4. A simpler and economical option could be to use preterm formula powder in fortifying  
266 EBM.

267 **GAPS IN KNOWLEDGE**

- 268 1. Paucity of data from India on benefits and complications of fortification with various  
269 fortification options.
- 270 2. Lack of studies directly comparing HMF and preterm formula fortification.

271

272 **RATIONALE OF CURRENT STUDY**

- 273 1. Preterm VLBW neonates require higher energy, protein and mineral requirements, which are  
274 not met by unfortified breast milk alone.
- 275 2. Many newborn care units therefore fortify EBM with commercially available human milk  
276 fortifier (HMF).
- 277 3. But fortification with HMF is expensive and is also associated with high risk of complications  
278 like feed intolerance and late metabolic acidosis, which often warrant temporary or permanent  
279 withholding of fortification.
- 280 4. A simpler and more economical option is to use commercially available preterm formula  
281 powder, in place of HMF, to fortify EBM. An earlier study from our unit at AIIMS demonstrated  
282 no significant difference in the osmolality of milk fortified with HMF and preterm formula  
283 powder.
- 284 5. Fortification with preterm formula powder might be associated with lower risk of feed  
285 intolerance and similar (not lower) weight gain in preterm neonates.
- 286 6. No studies have, however, examined the rates of weight gain following fortification of EB  
287 with preterm formula powder.

288

289 **Research methodology**

290 **Hypothesis**

291 Among preterm (28 – 34 weeks) VLBW infants (P), fortification of expressed breast milk with  
292 preterm formula powder (I) results in weight gain from the time of fortification until discharge  
293 from hospital or 40 weeks PMA whichever is earlier(T), not lower than 2 g/kg/day (O), when  
294 compared with the expected weight gain of 13.5 gm/kg/day following fortification with  
295 commercially available human milk fortifier (HMF) (C).

296 **Primary objective**

297 To compare the rate of weight gain from the time of enrolment until discharge from hospital or  
298 40 weeks PMA whichever is earlier, in preterm (28-34 weeks' gestation) VLBW neonates  
299 receiving expressed breast milk (EBM) fortified with preterm formula powder with those  
300 receiving EBM fortified with commercially available human milk fortifier (HMF).

301 **Secondary:**

302 Among preterm VLBW infants receiving EBM fortified with preterm formula powder or HMF,  
303 to compare the

- 304 1. Proportion of infants who are growth restricted at term gestation (40 weeks PMA)
- 305 2. Rates of gain in length and head circumference from the time of enrolment until  
306 discharge from hospital and at 40 weeks PMA
- 307 3. Incidence of feed intolerance and other morbidities including late metabolic acidosis  
308 (LMA), necrotizing enterocolitis (NEC) stage 2 or more, anemia requiring blood  
309 transfusion(s), and osteopenia of prematurity.

311 **Table 10: Objectives and definitions of the study, the methods and time period of**  
 312 **assessment.**

| <b>S. No</b> | <b>Objective</b>                                                                                | <b>Outcome measured</b>                                                         | <b>Definition</b>                                                                                                           | <b>Method</b>                                                                        | <b>Time Period</b>                                                              |
|--------------|-------------------------------------------------------------------------------------------------|---------------------------------------------------------------------------------|-----------------------------------------------------------------------------------------------------------------------------|--------------------------------------------------------------------------------------|---------------------------------------------------------------------------------|
| <b>1.</b>    | To compare the rate of in-hospital weight gain.                                                 | Rate of weight gain from the time of fortification till discharge from hospital | Average of weekly weight gain during hospital stay. Weekly weight gain calculated as per g/kg/day taking mid weekly weight. | Standard weighing machine with accuracy of 1 gm                                      | Till Discharge. 40 weeks PMA will be the end point if not discharged till then. |
| <b>2.</b>    | To compare the proportion of infants who are growth restricted at term gestation (40 weeks PMA) | Proportion of infants found to be postnatal growth restricted.                  | Weight at 40 weeks PMA taken and plotted in Fenton growth chart.                                                            | Babies falling <10 <sup>th</sup> centile at 40 weeks PMA using Fenton growth charts. | At 40wks PMA                                                                    |
| <b>3.</b>    | To compare the weekly gain in height and head circumference                                     | Average of weekly gain in length                                                | Baby laid in supine position, stabilized and head to foot length taken.                                                     | Infantometer                                                                         | Till discharge and 40wks PMA                                                    |
|              |                                                                                                 | Average of weekly gain in head circumference – OFC.                             | Widest possible circumference – Most prominent part of forehead to widest part of back of head.                             | Non-stretchable tape                                                                 |                                                                                 |
| <b>4.</b>    | To compare the incidence of morbidities                                                         | Late Metabolic Acidosis                                                         | Base deficit > 5mmol/L ; TCO2 <18                                                                                           | VBG                                                                                  | Till discharge and 40wks PMA                                                    |
|              |                                                                                                 | Necrotizing Enterocolitis                                                       | Clinical symptomatology with X-ray/ USG showing Pneumatosis Intestinalis and/or Gas in bile duct.                           | Clinical symptoms ± X-ray/ USG signs                                                 |                                                                                 |
|              |                                                                                                 | Osteopenia of prematurity                                                       | Phosphorous<4mg/dL with ALP>800IU/L.                                                                                        | Serum Calcium, Phosphorous, ALP with X-ray wrist SOS                                 |                                                                                 |
|              |                                                                                                 | Anemia requiring blood transfusion                                              | Refer table.12                                                                                                              | PCV by capillary centrifuge.                                                         |                                                                                 |
|              |                                                                                                 | Feed intolerance                                                                | Refer table.11                                                                                                              | Clinical symptom assessment by treating team                                         | Till discharge                                                                  |



314

315 **Study design:** Randomized non inferiority trial

316 **Study setting:** NICU, AIIMS, New Delhi

317 **Study duration:** 1 1/2 years, Oct 2017- June 2019.

318 **Inclusion criteria:**

- 319 1. Preterm neonates born between 28 and 34 weeks of gestation
- 320 2. Birth weight less than 1500 g
- 321 3. Accepting oral feeds of at least 100ml/kg/day
- 322 4. Amount of EBM, as a proportion of total daily milk intake, 75% or greater at
- 323 enrolment

324 **Exclusion criteria:**

325 Major congenital anomalies

326 **Sample size**

327 **Data and assumptions**

328 The data on PreNAN is still not available. The mean weight gain of neonates receiving fortification  
329 with HIJAM in our unit was found to be 13.5 g/kg/day (SD 3.8). Assuming that fortification with  
330 preterm formula powder will result in weight gain not lower than 2 g/kg/day i.e, a minimum weight  
331 gain of 11.5 g/kg/day with the same SD, and an alpha error of 5% and power of 90%, we have to  
332 enroll 62 neonates in each group.

333 **Screening and enrolment**

334 All neonates delivered at 28 to 34 completed weeks of gestation and weighing less than 1500 g at  
335 birth will be eligible for enrolment in the study. Details of eligible neonates will be entered in the  
336 screening form. They will be followed-up daily till they reach enteral feeds of at least 100  
337 ml/kg/day with >75% oral feeds being expressed breast milk (EBM). If found eligible, the  
338 parent(s) will be approached for consent for enrolling the neonate in the study. After obtaining  
339 written consent of either of the parents, the neonate will be enrolled in the study. At the time of  
340 getting consent, parents will be explained regarding the pros and cons of the study, follow up  
341 visit and the expected study duration.

342 Gestational age would be assessed from last menstrual period (LMP) or first trimester scan (T1  
343 scan), if LMP not available. If both are not available or a discrepancy of 1 week or greater is  
344 noted between the two, Expanded New Ballard Score (ENBS) will be used. In case of invitro  
345 fertilization (IVF) conception, date of embryo transfer will be considered in place of LMP. All  
346 neonates will be screened clinically for major congenital malformations. A Level II ultrasound  
347 will also guide in ruling out internal organ malformations. Baseline information regarding baby's  
348 identity, baby's hospital course, mother's medical history and the socio- economic details will be  
349 collected at the time of enrollment. This process will be continued till the required sample size  
350 will be met.

### 351 **Randomization**

352 Neonates will be randomized into two groups after enrolment into the study. We shall use  
353 stratified block randomization, with appropriate for gestational age (AGA) and small for  
354 gestational age (SGA) neonates being the two different strata. Within each stratum, blocks of  
355 varying sizes will be used for the process of randomization. This will thus ensure an equal  
356 number of participants in each group.

357 Allocation concealment of the principal investigator will be ensured by using serially numbered,  
358 sealed, opaque envelopes kept in the NICU. The principal investigator shall open the next  
359 serially numbered envelope upon enrolment of the neonate and randomize to either of the two  
360 groups.

### 361 **Blinding**

362 Blinding of the intervention is not possible because of the practical difficulties in blinding: (1)  
363 different color, texture, and odor of the two fortifiers and (2) need to provide additional  
364 supplements (Ca/Po4) in formula powder group. The outcome variables have been made as  
365 objective as possible and protocols have been developed for management of complications to avoid  
366 being biased by the nature of fortification.

### 367 **Intervention**

368 Neonates in the intervention group will receive fortification by preterm formula powder-  
369 DEXOLAC SPECIAL, at 1 g per 25 mL of EBM. We shall prepare the sachets for each neonate  
370 with the exact amount of powder required for the given feed volume. The sachets will be  
371 prepared by the pharmacy. Amount of breast milk will be measured by using 20 or 50 mL

372 syringe and the appropriate amount of DEXOLAC SPECIAL powder will be added by mixing  
373 the contents of the sachet with EBM. Nutritional audit will be done after 1 week of reaching full  
374 feeds and additional supplements (vitamin D, calcium, phosphorous and iron) will be added  
375 accordingly. Parents will be provided with supply for 2 weeks of DEXOLAC SPECIAL at the  
376 time of discharge. Supply will be replenished, every 2 weeks, till the baby reaches 40 weeks/ 2  
377 kg, whichever is later, provided the infant is still on EBM.

378 Neonates in the control group will be started with fortification by PreNAN/ other available  
379 fortifier, at 1 sachet (1g) to be added in 20 mL of EBM. Nutritional audit will be done after 1  
380 week to ensure the baby is getting the adequate amount of nutrients. At the time of discharge,  
381 parents will be given supply for 2 weeks. Supply will be replenished every 2 weeks until the  
382 baby reaches 40 weeks/ 2 kg, whichever is later, provided the infant is on EBM.

383 Compliance of using fortification will be ensured by regular phone calls to parents and by  
384 enquiring them during the visits at the time of ROP screening.

#### 385 **Follow up of subjects**

#### 386 **Growth assessment**

387 At birth, the neonate's anthropometric parameters- weight, length and head circumference will  
388 be taken and the same will be repeated at the time of enrollment, i.e. at the start of fortification.  
389 Weight will be taken by a standard digital weighing machine with an accuracy of 1g with  
390 minimal clothing. Length will be taken by an infantometer and head circumference by a non-  
391 stretchable tape.

392 These measurements will be taken at weekly intervals during the period of hospital stay and the  
393 rate of growth will be calculated. Neonates found to have inadequate weight gain <10 g/kg/day  
394 with a feed volume of 180 ml/kg/day during the previous week will be evaluated for other  
395 possible associated causes with PCV and VBG. An organic cause if found will be treated. If no  
396 organic cause is found, feed volume of the baby will be increased upto 200 ml/kg/day. If the  
397 babies are found to have weight gain less than the cutoff 10 g/kg/day, will be crossed over to the  
398 other fortifier, which is PreNAN in case of intervention group and preterm formula powder i/c/o  
399 control group. Other fortifying options like cornstarch and MCT oil will be considered in  
400 individual cases as per consensus during ward rounds.

401

402  
403

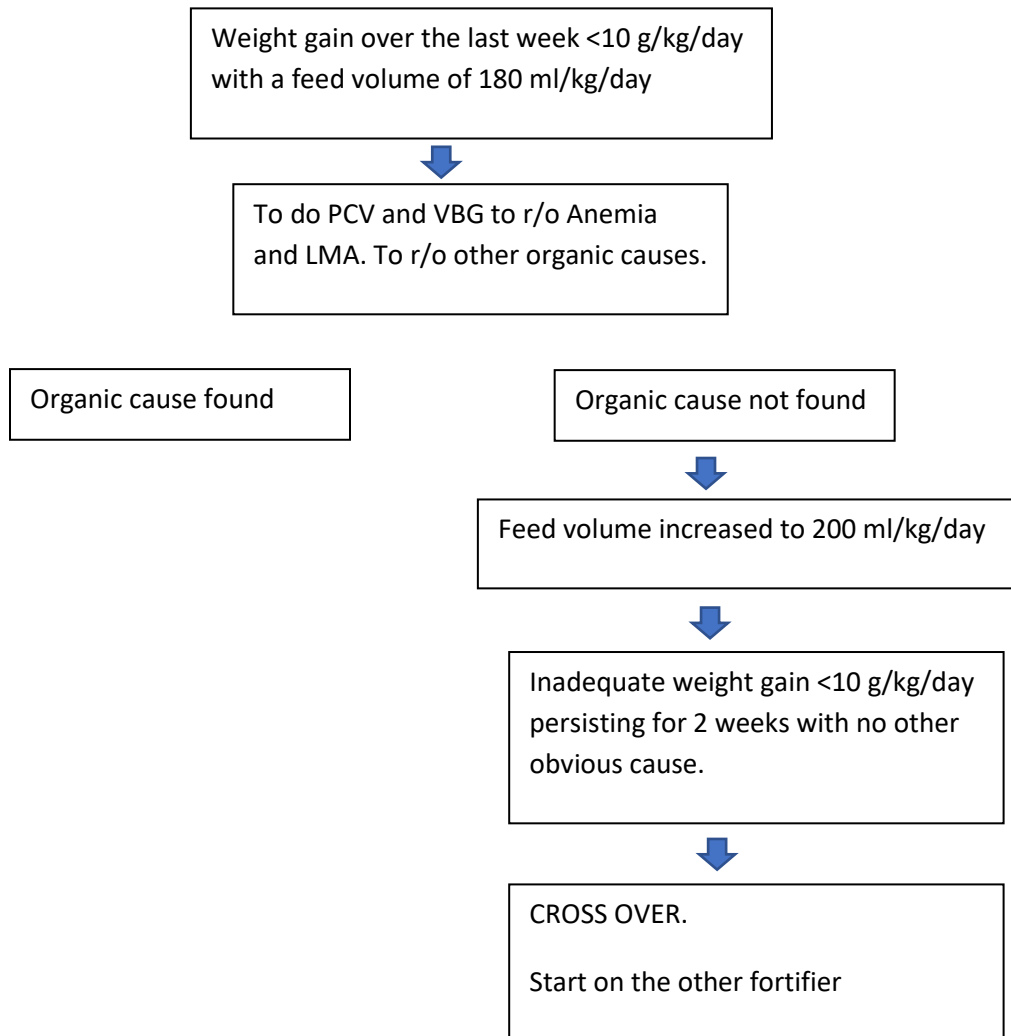

405 **Assessment of feed intolerance**

406  
407 Enrolled neonates will be looked for features suggestive of feed intolerance like vomiting -  
408 number of episodes, quantity of vomitus, bile stained, fresh blood or altered blood; pre-feed  
409 aspirate volume and color; abdominal distention >2 cm from baseline.

410 Feed intolerance is diagnosed if the infant qualifies with 2 parameters or greater (14). If the pre  
411 feed aspirate is <25%, 25-50% and milky in nature or baby vomits >50% of feed volume and  
412 milky in nature, the action will be to stop fortification for 6 hours and reassess (see Table 11).

413 **Table 11: Management of feed intolerance algorithm(14)**

| PARAMETER                                                                                                                                                                                         | FINDING                                                                 | ACTION                                           |
|---------------------------------------------------------------------------------------------------------------------------------------------------------------------------------------------------|-------------------------------------------------------------------------|--------------------------------------------------|
| Vomiting                                                                                                                                                                                          | >1 vomitus with yellow or green color/<br>fresh blood or altered blood* | Withhold feeding and evaluate<br>for NEC/ sepsis |
| Pre-feed aspirate color                                                                                                                                                                           | Bilious/ fresh blood/ altered blood                                     | Withhold feeding and evaluate<br>for NEC/ sepsis |
| Pre-feed aspirate<br>volume                                                                                                                                                                       | >50% of feed volume (to be checked<br>after 3 feeds)#                   | Withhold feeding and evaluate<br>for NEC/ sepsis |
| Abdominal girth                                                                                                                                                                                   | >2 cm increase over baseline in 24 hrs.                                 | Withhold feeding.                                |
| *, # - If the pre feed aspirate is <25%, 25-50% and milky in nature or baby vomits >50% of feed<br>volume and milky in nature, the action will be to stop fortification for 6 hours and reassess. |                                                                         |                                                  |

414

415 **Assessment of morbidities**

416 **Assessment of late metabolic acidosis (LMA)**

417 Weekly venous blood gas will be done, as per unit protocol, for all enrolled neonates until the  
418 time of discharge. Late metabolic acidosis (LMA) will be diagnosed with a base deficit >5  
419 mmol/L with TCO<sub>2</sub> <18 after 3<sup>rd</sup> day of life. TCO<sub>2</sub> will be calculated by summing HCO<sub>3</sub> and  
420 amount of CO<sub>2</sub> dissolved in plasma. Dissolved CO<sub>2</sub> will be calculated by multiplying 0.03 and  
421 PCO<sub>2</sub>. Neonates meeting criteria for late metabolic acidosis but with adequate weight gain  
422 (minimum of 10 gm/kg/day) will only be observed. Those with LMA and inadequate weight gain  
423 will be treated with 7.5% sodium bicarbonate (dose: 0.6\*Body weight\*Base deficit) till 2 weeks  
424 of age or till 36 weeks PMA, whichever is later. Fortification will be continued in these neonates.

425 **Assessment of osteopenia of prematurity(15)**

426 Samples will be taken for calcium, phosphorous and ALP on suspicion of osteopenia of  
427 prematurity and at 40 weeks PMA. Osteopenia will be diagnosed when ALP> 800 IU/L along with

428 a serum phosphorous value of <4 mg/dL. Diagnosis will be confirmed by decreased bone  
429 mineralization observed on a radiograph.

430 **Assessment of anemia requiring blood transfusion(15)**

431 PCV will be done in case of inadequate weight gain <10 g/kg/day during the previous week or  
432 on suspicion of anemia by the treating clinical team. Venous blood will be taken in a capillary  
433 tube and centrifuged at 8000-12000 rpm for 5 min and measured. Need for blood transfusion will  
434 be assessed with the following guidelines:

435 **Table 12: Table showing PCV cutoff for blood transfusion in neonates**

| S.No | Levels of respiratory support | Oxygen requirements         | <28 days (PCV) | >28 days (PCV) |
|------|-------------------------------|-----------------------------|----------------|----------------|
| 1.   | Assisted ventilation          | FiO <sub>2</sub> >0.3       | <40            | <30            |
|      |                               | FiO <sub>2</sub> <0.3       | <35            |                |
| 2.   | CPAP                          | Any FiO <sub>2</sub>        | <30            | <25            |
| 3.   | Spontaneously breathing       | Any age                     |                |                |
|      | a. Symptomatic anemia         | FiO <sub>2</sub> ≥0.35      | <35            |                |
|      |                               | FiO <sub>2</sub> >0.21-0.34 | <30            |                |
|      | b. Oxygen therapy             | FiO <sub>2</sub> >0.21      | <25            |                |
|      | c. Room air                   |                             | <20            |                |

436

437 **Assessment of Necrotizing Enterocolitis (NEC) stage 2 or more(15)**

438 Neonates will be observed by the treating clinical team daily for symptoms suggestive of NEC.  
439 After ruling out other causes, neonates with high suspicion of NEC will be done a USG and/or X-  
440 ray to look for pneumatosis intestinalis and/or portal venous gas. Neonates confirmed to have NEC  
441 will be treated according to the management guidelines.

442 **Neonatal data collection at the time of discharge**

443 At the time of discharge, neonates' anthropometric measurements will be recorded and details  
444 regarding the duration of hospital stay, type and mode of feed the baby is on, total duration of  
445 ventilator requirement and the total duration of TPN given will be recorded. Parents will be  
446 given 2 weeks supply of fortifiers and stressed on compliance, with the need of coming for  
447 follow up visits.

448 **Post discharge follow up**

449 Neonates will be followed up at 40 weeks PMA to assess the anthropometric status. Data  
450 regarding final diagnosis of morbidities like PDA, ROP, IVH, LOS and CLD will be recorded.  
451 Days of fortification given and the compliance will also be recorded. A final diagnosis regarding  
452 the presence or absence of EUGR will be assessed by using Fentons' growth charts.

### 453 **Data collection and management**

454 A case record form has been designed to record data pertinent to the study. The approval of  
455 faculty of neonatology division will be obtained prior to proceeding. All baseline variables and  
456 outcomes will be recorded in the Performa. Case record forms will be periodically checked and  
457 counter signed by the faculty. A database will be created in the Microsoft assess 2007  
458 (Microsoft, Redmond, CA) for recording the variables.

### 459 **Statistical analysis**

460 Data entry will be made in MS Assess 2007 (Microsoft Corp, Redmond, CA). Data analysis will  
461 be done by STATA/ SE 11.2 (Stata Corp, College station, Tx).

462 Data on feed intolerance, LMA, osteopenia of prematurity, NEC, anemia requiring blood  
463 transfusion, will be expressed as n (proportion). Test of significance will be Chi square test/  
464 Fisher Exact test. Incidence of feed intolerance, LMA, OOP, NEC and anemia will be calculated  
465 by dividing the number of neonates who developed the condition by total number of neonates  
466 started on a particular fortifier.

467 Anthropometric parameters and biochemical parameters will be represented as mean  $\pm$ SD and  
468 tested for significance by Student t test, assuming it to be normally distributed.

469 Being a non-inferiority trial, we intend to use both per protocol analysis as well as ITT for the  
470 key outcomes.

471  
472  
473  
474  
475  
476  
477  
478  
479  
480  
481



482

483

484 **Study flow**

485

All live births <34 weeks gestation born between June 2017- April 2019: Screened for eligibility

486

487 n1=n2=62

Neonates meeting the Inclusion criteria and after exclusion by exclusion criteria.  
Enroll after obtaining informed consent.

488

**INCLUSION CRITERIA:**  
1.Preterm neonates (28-34 wks)  
2.Birth weight 1500gms or lesser  
3.Neonates on feed volume of 100ml/kg/day of enteral feeds  
4.75% or greater of feeds being EBM.

**EXCLUSION CRITERIA:**  
Neonates with major congenital anomalies that threatens the life of baby.

Randomization to 2 groups: Preterm formula and HMF  
Stratification: AGA and SGA

Start fortification

Look for f/s/o Feed Intolerance and NEC daily.  
Measurement of weight, length and head circumference weekly  
Performance of PCV, LFT and VBG weekly

Final examination at 40 weeks for weight, length, head circumference, PCV, LFT and VBG

Assessment of outcome variables.

491 **Bibliography**

- 492 1. Liu L, Oza S, Hogan D, Perin J, Rudan I, Lawn JE, et al. Global, regional, and national  
493 causes of child mortality in 2000–13, with projections to inform post-2015 priorities: an  
494 updated systematic analysis. *The Lancet*. 2015 Jan 31;385(9966):430–40.
- 495 2. Nutrition C on. Nutritional Needs of Low-Birth-Weight Infants. *Pediatrics*. 1977 Oct  
496 1;60(4):519–30.
- 497 3. Vohr BR, Poindexter BB, Dusick AM, McKinley LT, Higgins RD, Langer JC, et al.  
498 Persistent Beneficial Effects of Breast Milk Ingested in the Neonatal Intensive Care Unit on  
499 Outcomes of Extremely Low Birth Weight Infants at 30 Months of Age. *Pediatrics*. 2007  
500 Oct 1;120(4):e953–9.
- 501 4. Meinen-Derr J, Poindexter B, Wrage L, Morrow A, Stoll B, Donovan E. Role of human  
502 milk in extremely low birth weight infants’ risk of necrotizing enterocolitis or death. *J*  
503 *Perinatol Off J Calif Perinat Assoc*. 2009 Jan;29(1):57–62.
- 504 5. Agostoni C, Buonocore G, Carnielli VP, De Curtis M, Darmaun D, Decsi T, et al. Enteral  
505 nutrient supply for preterm infants: commentary from the European Society of Paediatric  
506 Gastroenterology, Hepatology and Nutrition Committee on Nutrition. *J Pediatr*  
507 *Gastroenterol Nutr*. 2010 Jan;50(1):85–91.
- 508 6. Brown JV, Embleton ND, Harding JE, McGuire W. Multi-nutrient fortification of human  
509 milk for preterm infants. *Cochrane Database Syst Rev* [Internet]. 2016 [cited 2020 Oct  
510 17];(5). Available from:  
511 <https://www.cochranelibrary.com/cdsr/doi/10.1002/14651858.CD000343.pub3/information>
- 512 7. Kler N, Thakur A, Modi M, Kaur A, Garg P, Soni A, et al. Human Milk Fortification in  
513 India. *Nestle Nutr Inst Workshop Ser*. 2015;81:145–51.
- 514 8. El Sakka A, El Shimi MS, Salama K, Fayez H. Post Discharge Formula Fortification of  
515 Maternal Human Milk of Very Low Birth Weight Preterm Infants: An Introduction of a  
516 Feeding Protocol in a University Hospital. *Pediatr Rep*. 2016 Sep 19;8(3):6632.
- 517 9. Khorana M, Jiamsajamongkhon C. Pilot study on growth parameters and nutritional  
518 biochemical markers in very low birth weight preterm infants fed human milk fortified with  
519 either human milk fortifier or post discharge formula. *J Med Assoc Thail Chotmaihet*  
520 *Thangphaet*. 2014 Jun;97 Suppl 6:S164-175.
- 521 10. Bauer J, Gerss J. Longitudinal analysis of macronutrients and minerals in human milk  
522 produced by mothers of preterm infants. *Clin Nutr Edinb Scotl*. 2011 Apr;30(2):215–20.
- 523 11. Mukhopadhyay K, Narnag A, Mahajan R. Effect of human milk fortification in appropriate  
524 for gestation and small for gestation preterm babies: a randomized controlled trial. *Indian*  
525 *Pediatr*. 2007 Apr;44(4):286–90.
- 526 12. Cibulskis CC, Ambrecht ES. Association of metabolic acidosis with bovine milk-based  
527 human milk fortifiers. *J Perinatol Off J Calif Perinat Assoc*. 2015 Feb;35(2):115–9.

- 528 13. Agarwal R, Singal A, Aggarwal R, Deorari AK, Paul VK. Effect of fortification with  
529 human milk fortifier (HMF) and other fortifying agents on the osmolality of preterm breast  
530 milk. *Indian Pediatr.* 2004 Jan;41(1):63–7.
- 531 14. Tewari VV, Dubey SK, Kumar R, Vardhan S, Sreedhar CM, Gupta G. Early versus Late  
532 Enteral Feeding in Preterm Intrauterine Growth Restricted Neonates with Antenatal  
533 Doppler Abnormalities: An Open-Label Randomized Trial. *J Trop Pediatr.* 2018  
534 01;64(1):4–14.
- 535 15. Agarwal R, Sankar MJ, Paul VK, Deorari AK. *AIIMS Protocols in Neonatology.* 1 e. Vol.  
536 2. Place of publication not identified: CBS; 2015. 480 p.
- 537
- 538

539

**ANNEXURE 1:**

540 **PARENT/ LAR INFORMED CONSENT FORM (PICF)**

541 Participant identification number for this trial: \_\_\_\_\_

542 Title of the project: FORTIFICATION OF EXPRESSED BREAST MILK WITH PRETERM  
543 FORMULA POWDER Vs HUMAN MILK FORTIFIER IN PRETERM (28-34WKS) VLBW  
544 NEONATES: A RANDOMISED NON INFERIORITY TRIAL

545 Name of the Principal Investigator: JR Dr **C Arunambika**. Mobile Num: **9791239124**

546 Name of Co- Investigator: Asst Professor Dr. **M Jeeva Sankar** Phone: **011-26546166**

547 The contents of the information sheet dated \_\_\_\_\_ that was provided have been carefully read by  
548 me/ explained in detail to me, in a language that I comprehend, and I have fully understood the contents. I  
549 confirm that I have had the opportunities to ask questions.

550 The nature and purpose of the study and its potential risks/ benefits and expected duration of the study,  
551 and other relevant details of the study have been explained to me in detail. I understand that my consent  
552 for my baby’s participation is voluntary and that I can withdraw at any time in-between without giving  
553 any reasons, **without my baby’s medical care or legal rights being affected**. I understand that the  
554 information collected from my baby, the samples taken and sections of any of medical notes may be  
555 looked at by responsible individuals from AIIMS and for **using it for publishing/ literature purposes**,  
556 without disclosing my neonates’ identity.

557 Thus knowing all these, I give consent for my baby to take part in the study trial voluntarily **without any**  
558 **pressure by any means**.

559 **Date:** \_\_\_\_\_

560 **Place:** (Signature/ Left thumb impression)

561 Name of the parent/ LAR(Relation):

562 Son/ Daughter/ Spouse of:

563 Complete postal address:

564 This is to certify the above consent was obtained in my presence.

565 \_\_\_\_\_(Signature of Principal Investigator)

566 **1. Witness 1**

**2. Witness 2**

567 **Signature:**

**Signature:**

568 **Name:**

**Name:**

569 **Address**

**Address:**

570

571

572

573

574

575

## ANNEXURE – 2

### 576 Parent/ LAR Information Sheet

#### 577 i) Title of the study.

578 **“Fortification of expressed breast milk with preterm formula powder vs. human milk**  
579 **fortifier (HMF) in preterm (28-34 weeks) very low birth weight neonates: A Randomized**  
580 **non inferiority trial”**

581 Principal investigator: Dr. C Arunambika

582 Chief Guide: Dr. Jeeva Sankar M

583

#### 584 ii) Aims and methods of the research

585 Heartiest congratulations to you and your family on birth of your baby. This is indeed a moment  
586 of great happiness for you. Still, as you know, your baby is born too soon from dates and is not  
587 fully mature.

588 Preterm neonates are neonates that are “Born too soon”, i.e. before completion of 37 weeks.

589 These neonates may have more health issues and may have longer hospital stay when compared  
590 to neonates born later. One important issue is the high incidence of extra uterine growth  
591 restriction in these neonates. It is because though preterm breast milk has composition that is  
592 different from that of term milk, it alone cannot meet the high demands of these neonates and  
593 when given alone can manifest with multiple deficiencies and growth failure.

594 Thus studies have shown advantages in short term growth parameters with the use of fortifiers  
595 with expressed breast milk. It is current standard of care in our hospital to fortify breast milk in  
596 neonates <34 weeks and <1500gms neonates until the baby reaches 2 kg or 40 weeks, whichever  
597 is later, provided the baby is getting expressed breast milk. A human milk fortifier known as  
598 PreNAN is used for routine fortification in our wards.

599 However there are concerns regarding high incidence of feed intolerance, late metabolic acidosis  
600 and high cost with HMF fortification. Another plausible idea could be to fortify EBM with  
601 preterm formula powder, which could be an acceptable alternative. Even though the studies in  
602 this area is limited, and additional supplements are needed to meet the neonates nutrient  
603 requirement, available studies have shown it to be equal in efficacy with possibly decreased  
604 incidence of feed tolerance with preterm formula fortification.

605 You are being requested to give consent for your baby to be included in the study of efficacy and  
606 complications comparing two fortifiers, that is being added to increase the nutrient content of  
607 breast milk, currently used- PreNAN and the proposed fortifier- preterm formula powder-  
608 DEXOLAC SPECIAL. This study will aim to assess the difference in gain of anthropometric  
609 parameters and the incidence of morbidities like feed intolerance, late metabolic acidosis,  
610 osteopenia of prematurity, anemia and NEC that are known to be caused by these fortifiers.

611 Thus this study is to compare both fortifiers with regard to anthropometric measures- rate of  
612 increase of weight, length, head circumference and the incidence of complications with respect  
613 to feed intolerance, late metabolic acidosis, osteopenia and necrotizing enterocolitis.

614 Your baby, being preterm, will be screened for the eligibility to enroll in the study using a  
615 screening form. If your baby satisfies the eligibility criteria, then you will be given a choice to  
616 join the study. Your baby will be enrolled only after your willful consent. After your consent,  
617 neonates will be allotted randomly to one of these two groups, which will not be under the  
618 control of investigator, who will be unaware of the nature of your fortification.

619 After enrollment, some baseline data and measurements will be collected regarding mother, baby  
620 and the baby will be started on fortification. Symptoms such as vomiting, abdominal distention  
621 will be monitored daily by the treating physician either by asking directly from the caretakers or  
622 from nurses monitoring chart. Weekly anthropometric measures- weight, length and head  
623 circumference along with the required blood sample around 1.5ml will be taken by the principal  
624 investigator. These procedures are routine in the care of neonates on breast milk fortification and  
625 since these are important for the study, it is being done by the principal investigator.

626 Even with refusal to give consent for participating in the study, the baby will be started on  
627 fortification with PreNAN and the investigations will be continued, with no compromised  
628 clinical care of the baby. Your neonates' participation will help us to get some idea regarding the  
629 complications and efficacy of the two fortifiers, thus in formulating a hypothesis that in future  
630 could guide the decision of feeding preterm neonates.

631 Any complications that may arise during the study will be evaluated carefully by the treating  
632 team and be treated as per the current standard treatment protocol.

633 **iii) Expected duration of the subject participation.**

634 Till the baby reaches term gestation/ 40 weeks PMA. Maximum of 12 weeks.

635 iv) **The cost burden/benefits to be expected from the research to the subject or to others.**  
636 There will be no additional cost burden to you and your family due to this study. Neither will  
637 you be provided any financial benefit for being part of the study.

638 v) **Any risk to the subject due to participation in the study.**

639  
640 This study will be done like routine clinical care of the baby. No additional blood samples or  
641 investigation or procedure will be done for the sole purpose of the study. There will no risks to the  
642 subject due to this study.

643  
644 vi) **Provision of free treatment for research related injury and compensation of subjects for**  
645 **disability or death resulting from such injury.**

646  
647 Not applicable

648  
649 vii) **Maintenance of confidentiality of records.**

650  
651 The confidentiality of the personal details would be maintained. Data related to the study will be  
652 used for analysis and will be shared with responsible individuals. The information could also be  
653 published in text of any format, without revealing the neonates identity.

654 viii) **Freedom of individual to participate and to withdraw from research at any time,**  
655 **without penalty or loss of benefits to which the subject would otherwise be entitled.**

656 Your baby's participation in this study is purely voluntary and you may choose to withdraw from  
657 the study at any time after agreeing to participate in the study, without having to give any  
658 reasons. Choosing not to participate at any time will not affect treatment services your baby may  
659 be requiring now or in future. You can ask questions about this project at any time. You may  
660 contact the investigator given below, if you have any questions or grievances about this research  
661 study, either directly, through mail or contact number.

662 Please feel free to ask about anything you do not understand. Please consider this information  
663 sheet and consent form carefully before you agree to participate in our study.

664 **Contact Address:**

665 **Dr. C Arunambika**

666 **Junior Resident**

667 **Department of Pediatrics**

668 **AIIMS, New Delhi-110029**

669 **[arunambika.chinnappan@gmail.com](mailto:arunambika.chinnappan@gmail.com)**

**Dr. M Jeeva Sankar**

**Assistant Professor**

**Department of Pediatrics**

**AIIMS, New Delhi-110029**

**[jeevasankar@gmail.com](mailto:jeevasankar@gmail.com)**
