# Supplementary material
Source: PubMed Central journal article supplement (PMC8111561)
Supplement: jamapediatr-e210678-s002.pdf [file jamapediatr-e210678-s002.pdf]

## Supplemental Online Content

Chinnappan A, Sharma A, Agarwal R, Thukral A, Deorari A, Sankar MJ. Fortification of breast milk with preterm formula powder vs human milk fortifier in preterm neonates: a randomized noninferiority trial. *JAMA Pediatr*. Published online May 10, 2021. doi:10.1001/jamapediatrics.2021.0678

**eTable 1.** Composition of breast milk and the two fortifiers used in the study

**eTable 2.** Additional nutrients added with fortification in the two groups

**eTable 3.** Nutritional content of the fortified milk preparations considering enteral intake of 180 ml/kg with standardized fortification in the two groups

**eTable 4.** Comparison of outcomes related to individual components of feed intolerance in the two groups

**eTable 5.** Composition of preterm formula powders and human milk fortifiers available in India other than those used in the study

**eFigure 1.** Intervention overview

**eFigure 2.** Non inferiority margin and the mean difference in weight gain between two fortification strategies

This supplemental material has been provided by the authors to give readers additional information about their work.

**eTable 1. Composition of breast milk and the two fortifiers used in the study**

|                                  | <b>Expressed breast milk<br/>(in each 100 mL)</b> | <b>Preterm formula;<br/>Dexolac Special<br/>Care, DANONE India<br/>(in each gram)</b> | <b>Human milk fortifier;<br/>PreNAN (Nestle and<br/>Co., India)<br/>(in each gram)</b> |
|----------------------------------|---------------------------------------------------|---------------------------------------------------------------------------------------|----------------------------------------------------------------------------------------|
| <b>Calories, Kcal/kg/d</b>       | 67                                                | 5.00                                                                                  | 3.00                                                                                   |
| <b>Protein, g/kg/d</b>           | 1.1                                               | 0.13                                                                                  | 0.30                                                                                   |
| <b>Fat, g/kg/d</b>               | 3.6                                               | 0.26                                                                                  | 0.10                                                                                   |
| <b>Carbohydrates,<br/>g/kg/d</b> | 6.7                                               | 0.55                                                                                  | 0.40                                                                                   |
| <b>Calcium, mg/kg/d</b>          | 26.0                                              | 6.50                                                                                  | 15.93                                                                                  |
| <b>Phosphorus,<br/>mg/kg/d</b>   | 13.0                                              | 3.25                                                                                  | 8.76                                                                                   |
| <b>Vitamin D, IU/d</b>           | 2.0                                               | 6.00                                                                                  | 28.00                                                                                  |
| <b>Iron, mg/kg/d</b>             | 0.12                                              | 0.11                                                                                  | 0.36                                                                                   |
| <b>Vitamin A, IU/kg/d</b>        | 50.0                                              | 68.25                                                                                 | 221.60                                                                                 |
| <b>Vitamin E, IU/kg/d</b>        | 1.5                                               | 0.15                                                                                  | 1.12                                                                                   |
| <b>Vitamin K, mcg/kg/d</b>       | 0.20                                              | 0.90                                                                                  | 1.50                                                                                   |
| <b>Vitamin B6, mcg/kg/d</b>      | 14.0                                              | 10.24                                                                                 | 0.02                                                                                   |
| <b>Vitamin B12,<br/>mcg/kg/d</b> | 0                                                 | 0.02                                                                                  | 0.04                                                                                   |
| <b>Vitamin C, mg/kg/d</b>        | 10.6                                              | 0.90                                                                                  | 3.75                                                                                   |
| <b>Folic acid, mcg/kg/d</b>      | 3.3                                               | 2.25                                                                                  | 7.50                                                                                   |
| <b>Riboflavin, mcg/kg/d</b>      | 47.0                                              | 7.70                                                                                  | 40.00                                                                                  |
| <b>Thiamine, mcg/kg/d</b>        | 20.0                                              | 6.67                                                                                  | 30.00                                                                                  |
| <b>Magnesium, mg/kg/d</b>        | 3.0                                               | 0.50                                                                                  | 0.80                                                                                   |
| <b>Sodium, mEq/kg/d</b>          | 1.4                                               | 0.14                                                                                  | 0.32                                                                                   |
| <b>Potassium, mEq/kg/d</b>       | 2.4                                               | 0.10                                                                                  | 0.25                                                                                   |
| <b>Copper, mcg/kg/d</b>          | 73.0                                              | 4.80                                                                                  | 10.00                                                                                  |
| <b>Manganese,<br/>mcg/kg/d</b>   | 0.60                                              | 0.75                                                                                  | 1.21                                                                                   |
| <b>Zinc, mg/kg/d</b>             | 0.33                                              | 0.04                                                                                  | 0.19                                                                                   |

**eTable 2. Additional nutrients added with fortification in the two groups**

| <b>Additional nutrients</b>                                        | <b>Strength of formulation</b>         | <b>Intended Recommended dietary allowance (RDA)</b> | <b>Dose</b>                 |
|--------------------------------------------------------------------|----------------------------------------|-----------------------------------------------------|-----------------------------|
| <b>Preterm formula powder fortification – Dexolac special care</b> |                                        |                                                     |                             |
| Multivitamin drops                                                 |                                        |                                                     | 0.5 ml PO BD                |
| Syrup calcium phosphate                                            | 16 mg calcium/mL;<br>8mg phosphorus/mL | 120 – 140 mg/kg/day                                 | 0.5 ml per feed in 10 feeds |
| Drop Iron                                                          |                                        | 2 mg/kg/day                                         | 1 drop PO in 2 feeds        |
| Syrup vitamin D3                                                   | 400 IU/ml                              | 800 IU/day                                          | 1 ml PO BD                  |
| <b>Human milk fortifier – PreNAN</b>                               |                                        |                                                     |                             |
| Syp Vitamin D3                                                     | 400 IU/ml                              | 800 IU/day                                          | 1 ml PO BD                  |

**eTable 3. Nutritional content of the fortified milk preparations considering enteral intake of 180 ml/kg with standardized fortification in the two groups**

|                              | <b>RDA (ESPGHAN)</b> | <b>PTF</b> | <b>HMF</b> |
|------------------------------|----------------------|------------|------------|
| <b>Calories, Kcal/kg/d</b>   | 110-135              | 156.6      | 142.2      |
| <b>Protein, g/kg/d</b>       | 3.5-4.0              | 2.92       | 4.14       |
| <b>Fat, g/kg/d</b>           | 4.8-6.6              | 8.35       | 7.2        |
| <b>Carbohydrates, g/kg/d</b> | 11.6-13.2            | 16.02      | 14.94      |
| <b>Calcium, mg/kg/d</b>      | 120-140              | 93.6       | 161.5      |
| <b>Phosphorus, mg/kg/d</b>   | 60-90                | 46.8       | 86.47      |
| <b>Vitamin D, IU/d</b>       | 800-1000             | 46.8       | 205.2      |
| <b>Iron, mg/kg/d</b>         | 2-3                  | 1.04       | 2.81       |
| <b>Vitamin A, IU/kg/d</b>    | 1330-3300            | 581.4      | 1685.5     |
| <b>Vitamin E, IU/kg/d</b>    | 2.2-11               | 3.78       | 10.76      |
| <b>Vitamin K, mcg/kg/d</b>   | 4.4-28               | 6.84       | 11.16      |
| <b>Vitamin B6, mcg/kg/d</b>  | 45-300               | 98.93      | 25.34      |
| <b>Vitamin B12, mcg/kg/d</b> | 0.1-0.77             | 0.14       | 0.3        |
| <b>Vitamin C, mg/kg/d</b>    | 11.0-46              | 25.56      | 46.08      |
| <b>Folic acid, mcg/kg/d</b>  | 35-100               | 22.14      | 59.94      |
| <b>Riboflavin, mcg/kg/d</b>  | 200-400              | 140.04     | 372.6      |
| <b>Thiamine, mcg/kg/d</b>    | 140-300              | 84.02      | 252.0      |
| <b>Magnesium, mg/kg/d</b>    | 8.0-15.0             | 9.0        | 11.16      |
| <b>Sodium, mEq/kg/d</b>      | 3.0-5.0              | 3.53       | 4.82       |
| <b>Potassium, mEq/kg/d</b>   | 3.0-5.0              | 5.04       | 6.12       |
| <b>Copper, mcg/kg/d</b>      | 100-132              | 165.96     | 203.4      |
| <b>Manganese, mcg/kg/d</b>   | <27.5                | 6.48       | 9.79       |
| <b>Zinc, mg/kg/d</b>         | 1.1-2.0              | 0.87       | 1.96       |

Abbreviations: ESPGHAN, European Society for Paediatric Gastroenterology Hepatology and Nutrition; HMF, human milk fortifier; PTF, preterm formula; RDA, recommended dietary allowance

**eTable 4. Comparison of outcomes related to individual components of feed intolerance in the two groups**

| <b>Variables</b>                                             | <b>Preterm formula fortification (n = 59)</b> | <b>Human milk fortifier (n = 63)</b> | <b>Relative risk (95% CI)</b> | <b>P value</b> |
|--------------------------------------------------------------|-----------------------------------------------|--------------------------------------|-------------------------------|----------------|
| >2 episodes vomiting, No. (%)                                | 23 (39)                                       | 30 (48)                              | 0.82 (0.54 to 1.23)           | 0.34           |
| Abdominal distension(> 2 cm), any episode, No. (%)           | 6 (10)                                        | 10 (16)                              | 0.64 (0.25 to 1.65)           | 0.35           |
| Prefeed aspirate >50%, No. (%)                               | 0                                             | 0                                    | -                             | -              |
| Bilious vomiting, No. (%)                                    | 1 (2)                                         | 2 (3)                                | 0.53 (0.05 to 5.73)           | 0.59           |
| Altered blood in vomitus, No. (%)                            | 0                                             | 3 (5)                                | -                             | 0.49           |
| At least one episode of feed intolerance, No. (%)            | 2 (3)                                         | 9 (14)                               | 0.24 (0.05 to 1.05)           | 0.06           |
| Need to withhold fortification for 24 hours or more, No. (%) | 3 (5)                                         | 14 (22)                              | 0.23 (0.07 to 0.76)           | 0.01           |

**eTable 5. Composition of preterm formula powders and human milk fortifiers available in India other than those used in the study**

| Composition           | Human Milk Fortifier (HMF) powder    |                         | Preterm formula powder                   |                         |
|-----------------------|--------------------------------------|-------------------------|------------------------------------------|-------------------------|
|                       | Lactodex (Raptakos, Brett & Co.Ltd.) | HIJAM (Endocura Pharma) | Lactodex LBW (Raptakos, Brett & Co.Ltd.) | Similac Neosure (Abott) |
| Calories, Kcal/kg/d   | 3.37                                 | 3.6                     | 4.99                                     | 5.17                    |
| Protein, g/kg/d       | 0.27                                 | 0.25                    | 0.13                                     | 0.13                    |
| Fat, g/kg/d           | 0.04                                 | 0.25                    | 0.26                                     | 0.28                    |
| Carbohydrates, g/kg/d | 0.49                                 | 0.05                    | 0.535                                    | 0.534                   |
| Calcium, mg/kg/d      | 15.8                                 | 25                      | 6.5                                      | 6.67                    |
| Phosphorus, mg/kg/d   | 7.9                                  | 12.5                    | 3.25                                     | 3.33                    |
| Vitamin D, IU/d       | 133                                  | 100                     | 7                                        | 6                       |
| Iron, mg/kg/d         | 0.3                                  | 0.36                    | 0.12                                     | 0.09                    |
| Vitamin A, IU/kg/d    | 200                                  | 155                     | 65                                       | 30                      |
| Vitamin E, IU/kg/d    | 1.25                                 | 0.62                    | 0.25                                     | 0.18                    |
| Vitamin K, mcg/kg/d   | 1.1                                  | 0.55                    | 0.71                                     | 0.61                    |
| Vitamin B6, mcg/kg/d  | 25                                   | 12.5                    | 6.5                                      | 5.2                     |
| Vitamin B12, mcg/kg/d | 0.05                                 | 0.025                   | 0.025                                    | 0.02                    |
| Vitamin C, mg/kg/d    | 5                                    | 2.5                     | 1.15                                     | 1.89                    |
| Folic acid, mcg/kg/d  | 12.5                                 | 20                      | 2                                        | 1.9                     |
| Riboflavin, mcg/kg/d  | 20                                   | 10                      | 10.5                                     | 9.75                    |
| Thiamine, mcg/kg/d    | 18.5                                 | 6                       | 7.5                                      | 9.0                     |
| Magnesium, mg/kg/d    | 1.75                                 | 2                       | 0.5                                      | 0.61                    |
| Sodium, mEq/kg/d      | 0.082                                | 0.173                   | 0.16                                     | 0.1                     |
| Potassium, mEq/kg/d   | 0.23                                 | 0.41                    | 0.12                                     | 0.16                    |
| Copper, mcg/kg/d      | 14.3                                 | 12.5                    | 5                                        | 6.16                    |
| Manganese, mcg/kg/d   | 1.7                                  | 0.85                    | 0.68                                     | 0.51                    |
| Zinc, mg/kg/d         | 0.04                                 | 0.04                    | 0.04                                     | 0.034                   |

**eFigure 1. Intervention overview**

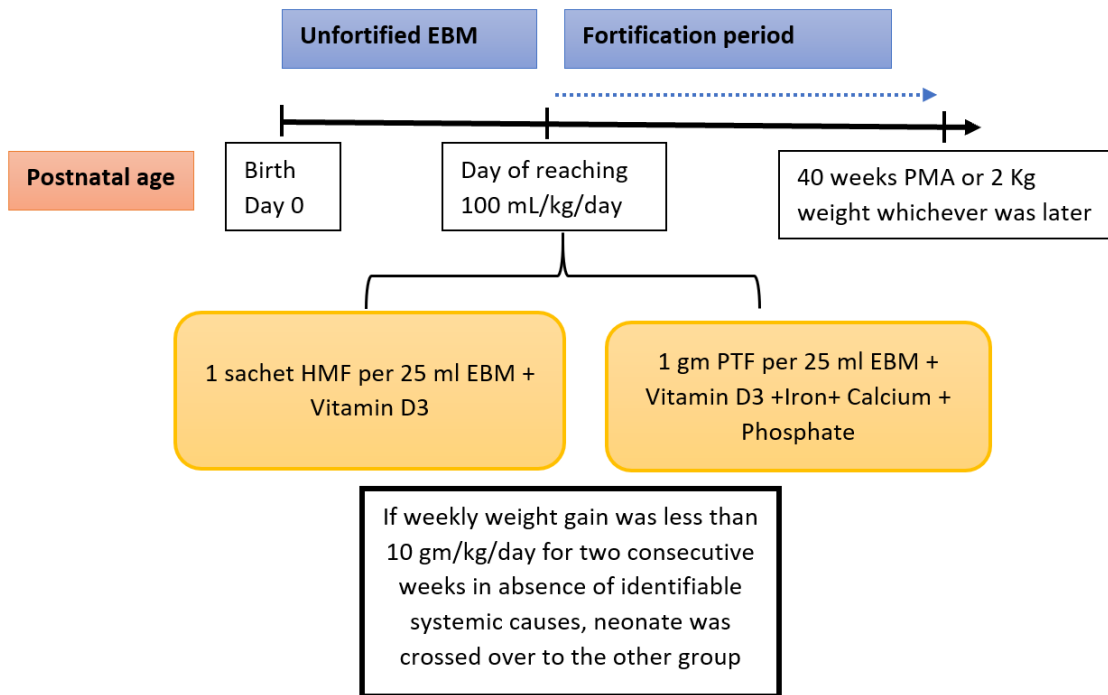

**eFigure 2. Non inferiority margin and the mean difference in weight gain between the two fortification strategies**

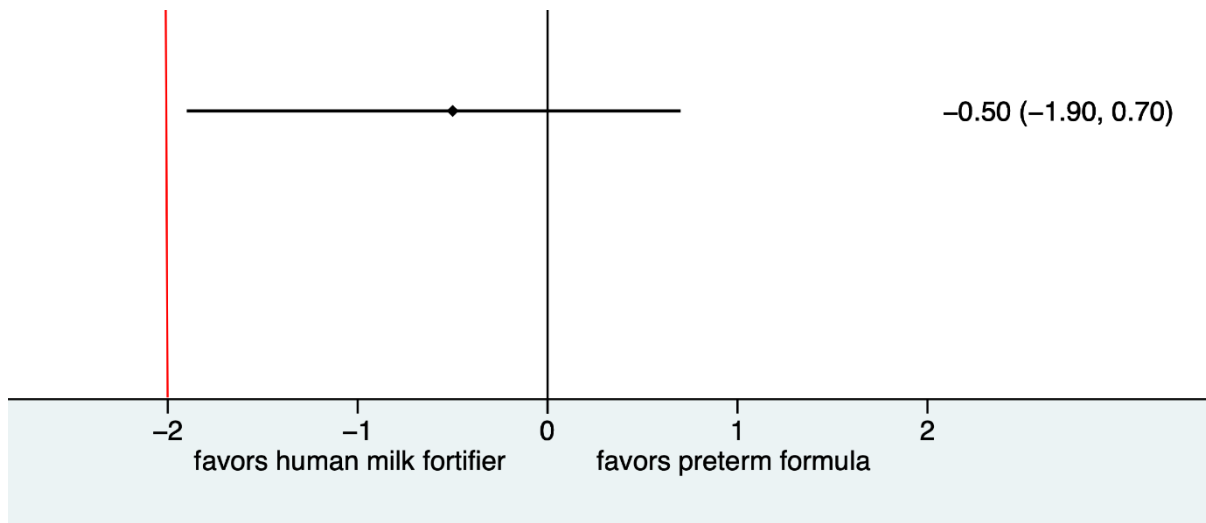

95% CI of mean difference of weight gain with preterm formula fortification did not cross the pre-specified non-inferiority margin of 2 g/kg/day indicated by the solid red line.
