# Supplementary material
Source: PubMed Central journal article supplement (PMC8111561)
Supplement: jamapediatr-e210678-s003.pdf [file jamapediatr-e210678-s003.pdf]

1        **Fortification of Expressed Breast Milk with Preterm Formula Powder vs.**  
2        **Human Milk Fortifier in Preterm (28-34 weeks' Gestation) Very Low Birth**  
3        **Weight Neonates: a Randomized non inferiority trial**

4

5

6

7

**Statistical Analysis Plan**

8

9

10

## 11 **1. Introduction**

12 Very low birth weight (VLBW) neonates require fortification of human milk to meet the  
13 recommended dietary allowances of nutritional intake. Commercial human milk fortifiers are  
14 costly and therefore, sparingly used in low and middle income (LMIC) countries, leading to  
15 postnatal growth restriction. This has significant public health implications in resource  
16 restricted countries where burden of prematurity, neonatal mortality and morbidity is  
17 extremely high. The study intervention will evaluate a low-cost alternative to the commercial  
18 fortifiers. If the study demonstrates benefit of the new intervention, it can lead to significant  
19 cost savings to an already overburdened healthcare system in LMIC. Our study will test the  
20 hypothesis that preterm formula fortification will be non-inferior to fortification by a human  
21 milk fortifier in very low birth weight neonates.

## 22 **2. Descriptive statistics**

23 Patient characteristics will be summarized by randomization group, which will be labelled as  
24 preterm formula (PTF) and human milk fortifier (HMF). For continuous variables, mean with  
25 standard deviation or median with interquartile range will be reported depending on the  
26 skewness of the data. Student t test will be used to compare means of the two groups. Where  
27 appropriate, Wilcoxon rank sum test will be used for continuous data. Categorical outcomes  
28 will be represented as counts and percentages and compared by using the  $\chi^2$  test. Any group  
29 characteristics that are identified as either statistically significantly different ( $p < 0.05$ ) or  
30 clinically disparate will be considered as covariates.

## 31 **3. Primary Analysis**

32 **3.1 Primary outcome:** n-hospital weight gain (g/kg/d), i.e., from enrolment until discharge  
33 or 40 weeks PMA, whichever is earlier

34 **3.2 Secondary outcome:** head circumference and length (in cm) at discharge, extrauterine  
35 growth restriction, feed intolerance, late onset sepsis, intraventricular hemorrhage, anemia of  
36 prematurity, late metabolic acidosis, metabolic bone disease, retinopathy of prematurity,  
37 bronchopulmonary dysplasia, mortality.

38 **3.3 Analysis plan:** The primary hypothesis to be tested is whether in-hospital weight gain  
39 after fortification with PTF is non-inferior to HMF group. The absolute non-inferiority  
40 margin is set at 2g/kg/d. The null hypothesis for the formal statistical test is that the PTF is  
41 inferior to HMF group with a 2g/kg/day non-inferiority margin ( $\mu_{\text{PTF}} - \mu_{\text{HMF}} < -2\text{g/kg/d}$ ). The

42 alterative hypothesis is that PTF is non-inferior ( $\mu_{\text{PTF}} - \mu_{\text{HMF}} > -2\text{g/kg/d}$ ). If the lower bound  
43 of confidence interval is more than  $-2\text{g/kg/d}$ , the non-inferiority of the intervention will be  
44 established. This will be tested based on a 2-sided confidence interval for the true difference  
45 in means ( $\mu_{\text{PTF}} - \mu_{\text{HMF}}$ ).

46 Potential covariates that shall be considered for adjusting primary analysis include gestation,  
47 gender, birth weight, and small for gestational age. SGA status will be stratified at the time  
48 of randomization. Covariate adjustment will be done only if significant imbalances are found  
49 in between the two groups for the individual covariates.

50 Both intention-to-treat and per-protocol analysis will be performed.

51 The feed intolerance related outcomes will be represented as incidence density (number of  
52 episodes per 1000 patient-days). Poisson or negative binomial regression model will be used  
53 for calculating the incidence rate ratio (depending on the dispersion of the count data for feed  
54 intolerance). The other secondary outcome data will be handled as mentioned for descriptive  
55 statistics above.

56 **3.4 Sample size and power:** The unit data for weight gain in VLBW neonates with human  
57 milk fortifier is available for HIJAM, which is  $13.5\text{ g/kg/day}$  (SD 3.8). The fortifier currently  
58 being used is PreNAN (Nestle and Co., India), the weight gain data for which is not available.  
59 Assuming that fortification with preterm formula powder (Dexolac Special Care, DANONE  
60 India) will result in weight gain not lower than  $2\text{ g/kg/day}$  i.e., a minimum weight gain of  
61  $11.5\text{ g/kg/day}$  with the same SD, and an alpha error of 5% and power of 90%, we have to  
62 enrol 62 neonates in each group.

63
