# Supplementary material
Source: PubMed Central journal article supplement (PMC8111561)
Supplement: jamapediatr-e210678-s004.pdf [file jamapediatr-e210678-s004.pdf]

## Data Sharing Statement

Chinnappan. Fortification of Breast Milk With Preterm Formula Powder vs Human Milk Fortifier in Preterm Neonates. *JAMA Pediatr*. Published May 10, 2021. doi:10.1001/jamapediatrics.2021.0678

### Data

**Data available:** Yes

**Data types:** Deidentified participant data

**How to access data:** Proposals should be submitted to [jeevasankar@gmail.com](mailto:jeevasankar@gmail.com)

**When available:** With publication

### Supporting Documents

**Document types:** None

### Additional Information

**Who can access the data:** Researchers who provide a methodologically sound proposal for use in achieving the goals relevant to the concerned subject (infant and newborn nutrition and growth)

**Types of analyses:** Meta-analysis and other types of secondary analyses

**Mechanisms of data availability:** After approval of a proposal
